# Supplementary material
Source: ML conference proceedings conference paper supplement (https://aclanthology.org/K19-1011)
Supplement: Attachment [file K19-1011.Attachment.zip]

## Hypothesis 1: L1-L2 word list with cosine similarity scores

### Monolingual word embeddings (Vecmap):

|        |              |        |        |              |        |
|--------|--------------|--------|--------|--------------|--------|
| bank   | banca        | -0.069 | strike | attacco      | -0.033 |
| bank   | riva         | 0.009  | strike | sciopero     | -0.03  |
| bank   | sponda       | 0.0    | down   | giù          | -0.038 |
| bank   | argine       | 0.006  | down   | piumino      | 0.009  |
| ball   | palla        | -0.09  | down   | caccia       | 0.016  |
| ball   | ballo        | -0.022 | down   | chiuso       | 0.084  |
| date   | data         | -0.067 | post   | posto        | -0.054 |
| date   | appuntamento | -0.08  | post   | paletto      | -0.126 |
| change | cambio       | -0.03  | free   | libero       | 0.01   |
| change | moneta       | -0.005 | free   | gratuito     | 0.027  |
| change | cambiare     | 0.052  | shoot  | germoglio    | 0.06   |
| change | resto        | 0.028  | shoot  | tirare       | 0.027  |
| sheet  | foglio       | 0.037  | well   | pozzo        | 0.043  |
| sheet  | lenzuola     | 0.061  | well   | bene         | 0.051  |
| sheet  | lastra       | -0.034 | fire   | fuoco        | -0.082 |
| sheet  | telo         | 0.08   | fire   | licenziare   | -0.018 |
| part   | parte        | -0.027 | hot    | caldo        | 0.033  |
| part   | separare     | 0.036  | hot    | piccante     | -0.045 |
| people | popolo       | -0.17  | last   | ultimo       | 0.031  |
| people | persone      | 0.009  | last   | durare       | 0.014  |
| wood   | legno        | -0.02  | spot   | posto        | 0.061  |
| wood   | bosco        | -0.058 | spot   | pallino      | 0.009  |
| smell  | odorato      | 0.045  | spot   | puntino      | 0.011  |
| smell  | puzza        | 0.09   | spot   | macchiato    | -0.009 |
| block  | blocco       | -0.005 | spot   | notare       | 0.016  |
| block  | ceppo        | -0.02  | spot   | individuare  | 0.099  |
| block  | isolato      | -0.075 | tap    | rubinetto    | 0.104  |
| block  | cubo         | 0.04   | tap    | rintocco     | 0.055  |
| block  | bloccare     | 0.022  | tap    | colpo        | -0.021 |
| block  | ostacolare   | -0.047 | tap    | battere      | 0.033  |
| price  | prezzo       | -0.015 | bar    | bar          | 0.025  |
| price  | costo        | 0.011  | bar    | sbarra       | 0.075  |
| grade  | grado        | 0.067  | tie    | cravatta     | -0.073 |
| grade  | voto         | -0.111 | tie    | legare       | 0.075  |
| spring | primavera    | 0.046  | stamp  | francobollo  | 0.024  |
| spring | molla        | 0.072  | stamp  | stampo       | 0.03   |
| play   | giocare      | -0.041 | fair   | fiera        | -0.12  |
| play   | suonare      | -0.02  | fair   | biondo       | -0.05  |
| light  | chiaro       | -0.009 | fair   | chiaro       | -0.086 |
| light  | leggero      | -0.071 | fair   | giusto       | 0.07   |
| blue   | blu          | -0.004 | fair   | equo         | 0.054  |
| blue   | azzurro      | 0.023  | train  | treno        | -0.009 |
| blue   | celeste      | 0.085  | train  | addestrare   | 0.027  |
| blue   | triste       | 0.031  | bolt   | lampo        | -0.077 |
| draw   | disegnare    | -0.063 | bolt   | catenaccio   | -0.023 |
| draw   | pareggiare   | -0.095 | bolt   | serratura    | 0.075  |
| fall   | autunno      | 0.08   | cold   | freddo       | 0.007  |
| fall   | cadere       | 0.078  | cold   | raffreddore  | -0.044 |
| right  | destra       | -0.077 | cross  | croce        | -0.047 |
| right  | giusto       | 0.048  | cross  | attraversare | 0.134  |
| lift   | ascensore    | 0.001  |        |              |        |
| lift   | sollevare    | 0.019  |        |              |        |
| lead   | dirigere     | 0.029  |        |              |        |
| lead   | piombo       | -0.031 |        |              |        |
| strike | colpire      | 0.076  |        |              |        |

## Cross-lingual word embeddings (Vecmap):

|        |              |       |        |              |       |        |
|--------|--------------|-------|--------|--------------|-------|--------|
| bank   | banca        | 0.745 | strike | attacco      | 0.452 |        |
| bank   | riva         | 0.162 | strike | sciopero     |       | 0.672  |
| bank   | sponda       | 0.308 | down   | giù          | 0.477 |        |
| bank   | argine       | 0.165 | down   | piumino      | 0.014 |        |
| ball   | palla        | 0.713 | down   | caccia       | 0.162 |        |
| ball   | ballo        | 0.168 | down   | chiuso       | 0.206 |        |
| date   | data         | 0.629 | post   | posto        | 0.267 |        |
| date   | appuntamento | 0.204 | post   | paletto      | 0.169 |        |
| change | cambio       | 0.45  | free   | libero       | 0.625 |        |
| change | moneta       | 0.169 | free   | gratuito     | 0.586 |        |
| change | cambiare     | 0.633 | shoot  | germoglio    |       | -0.022 |
| change | resto        | 0.117 | shoot  | tirare       | 0.326 |        |
| sheet  | foglio       | 0.417 | well   | pozzo        | 0.016 |        |
| sheet  | lenzuola     | 0.141 | well   | bene         | 0.475 |        |
| sheet  | lastra       | 0.358 | fire   | fuoco        | 0.693 |        |
| sheet  | telo         | 0.31  | fire   | licenziare   |       | 0.07   |
| part   | parte        | 0.571 | hot    | caldo        | 0.661 |        |
| part   | separare     | 0.095 | hot    | piccante     |       | 0.338  |
| people | popolo       | 0.477 | last   | ultimo       | 0.723 |        |
| people | persone      | 0.8   | last   | durare       | 0.307 |        |
| wood   | legno        | 0.701 | spot   | posto        | 0.426 |        |
| wood   | bosco        | 0.399 | spot   | pallino      | 0.222 |        |
| smell  | odorato      | 0.487 | spot   | puntino      | 0.395 |        |
| smell  | puzza        | 0.436 | spot   | macchiato    |       | 0.038  |
| block  | blocco       | 0.586 | spot   | notare       | 0.177 |        |
| block  | ceppo        | 0.118 | spot   | individuare  |       | 0.271  |
| block  | isolato      | 0.287 | tap    | rubinetto    |       | 0.452  |
| block  | cubo         | 0.213 | tap    | rintocco     | 0.052 |        |
| block  | bloccare     | 0.441 | tap    | colpo        | 0.151 |        |
| block  | ostacolare   | 0.243 | tap    | battere      | 0.202 |        |
| price  | prezzo       | 0.821 | bar    | bar          | 0.659 |        |
| price  | costo        | 0.62  | bar    | sbarra       | 0.397 |        |
| grade  | grado        | 0.256 | tie    | cravatta     | 0.363 |        |
| grade  | voto         | 0.148 | tie    | legare       | 0.373 |        |
| spring | primavera    | 0.738 | stamp  | francobollo  |       | 0.491  |
| spring | molla        | 0.154 | stamp  | stampo       | 0.104 |        |
| play   | giocare      | 0.724 | fair   | fiera        | 0.379 |        |
| play   | suonare      | 0.42  | fair   | biondo       | 0.01  |        |
| light  | chiaro       | 0.249 | fair   | chiaro       | 0.195 |        |
| light  | leggero      | 0.291 | fair   | giusto       | 0.447 |        |
| blue   | blu          | 0.772 | fair   | equo         | 0.57  |        |
| blue   | azzurro      | 0.471 | train  | treno        | 0.762 |        |
| blue   | celeste      | 0.211 | train  | addestrare   |       | 0.241  |
| blue   | triste       | 0.204 | bolt   | lampo        | 0.232 |        |
| draw   | disegnare    | 0.409 | bolt   | catenaccio   |       | 0.235  |
| draw   | pareggiare   | 0.357 | bolt   | serratura    |       | 0.415  |
| fall   | autunno      | 0.355 | cold   | freddo       | 0.689 |        |
| fall   | cadere       | 0.428 | cold   | raffreddore  |       | 0.384  |
| right  | destra       | 0.398 | cross  | croce        | 0.557 |        |
| right  | giusto       | 0.5   | cross  | attraversare |       | 0.421  |
| lift   | ascensore    | 0.344 |        |              |       |        |
| lift   | sollevare    | 0.359 |        |              |       |        |
| lead   | dirigere     | 0.237 |        |              |       |        |
| lead   | piombo       | 0.065 |        |              |       |        |
| strike | colpire      | 0.34  |        |              |       |        |

## Cross-lingual word embeddings (concepts):

|        |              |        |        |              |        |
|--------|--------------|--------|--------|--------------|--------|
| bank   | banca        | 0.634  | lead   | piombo       | 0.03   |
| bank   | riva         | 0.335  | strike | colpire      | 0.462  |
| bank   | sponda       | 0.394  | strike | attacco      | 0.536  |
| bank   | argine       | 0.272  | strike | sciopero     | 0.593  |
| ball   | palla        | 0.726  | down   | giù          | 0.565  |
| ball   | ballo        | 0.102  | down   | piumino      | 0.136  |
| date   | data         | 0.495  | down   | caccia       | 0.199  |
| date   | appuntamento | 0.193  | down   | chiuso       | 0.247  |
| change | cambio       | 0.29   | post   | posto        | 0.177  |
| change | moneta       | 0.067  | post   | paletto      | -0.09  |
| change | cambiare     | 0.623  | free   | libero       | 0.435  |
| change | resto        | -0.025 | free   | gratuito     | 0.423  |
| sheet  | foglio       | 0.549  | shoot  | germoglio    | 0.069  |
| sheet  | lenzuola     | 0.342  | shoot  | tirare       | 0.537  |
| sheet  | lastra       | 0.444  | well   | pozzo        | -0.058 |
| sheet  | telo         | 0.387  | well   | bene         | 0.095  |
| part   | parte        | 0.407  | fire   | fuoco        | 0.66   |
| part   | separare     | 0.015  | fire   | licenziare   | -0.013 |
| people | popolo       | 0.436  | hot    | caldo        | 0.533  |
| people | persone      | 0.667  | hot    | piccante     | 0.363  |
| wood   | legno        | 0.697  | last   | ultimo       | 0.441  |
| wood   | bosco        | 0.309  | last   | durare       | 0.329  |
| smell  | odorato      | 0.438  | spot   | posto        | 0.481  |
| smell  | puzza        | 0.538  | spot   | pallino      | 0.279  |
| block  | blocco       | 0.471  | spot   | puntino      | 0.35   |
| block  | ceppo        | 0.144  | spot   | macchiato    | 0.082  |
| block  | isolato      | 0.342  | spot   | notare       | 0.075  |
| block  | cubo         | 0.32   | spot   | individuare  | 0.001  |
| block  | bloccare     | 0.288  | tap    | rubinetto    | 0.402  |
| block  | ostacolare   | 0.121  | tap    | rintocco     | 0.143  |
| price  | prezzo       | 0.75   | tap    | colpo        | 0.127  |
| price  | costo        | 0.624  | tap    | battere      | 0.271  |
| grade  | grado        | 0.243  | bar    | bar          | 0.516  |
| grade  | voto         | 0.062  | bar    | sbarra       | 0.252  |
| spring | primavera    | 0.554  | tie    | cravatta     | 0.247  |
| spring | molla        | 0.07   | tie    | legare       | 0.173  |
| play   | giocare      | 0.656  | stamp  | francobollo  | 0.58   |
| play   | suonare      | 0.455  | stamp  | stampo       | 0.131  |
| light  | chiaro       | 0.301  | fair   | fiera        | 0.542  |
| light  | leggero      | 0.399  | fair   | biondo       | 0.055  |
| blue   | blu          | 0.777  | fair   | chiaro       | 0.076  |
| blue   | azzurro      | 0.674  | fair   | giusto       | 0.205  |
| blue   | celeste      | 0.336  | fair   | equo         | 0.442  |
| blue   | triste       | 0.089  | train  | treno        | 0.775  |
| draw   | disegnare    | 0.237  | train  | addestrare   | 0.236  |
| draw   | pareggiare   | 0.527  | bolt   | lampo        | 0.287  |
| fall   | autunno      | 0.338  | bolt   | catenaccio   | 0.18   |
| fall   | cadere       | 0.44   | bolt   | serratura    | 0.374  |
| right  | destra       | 0.477  | cold   | freddo       | 0.624  |
| right  | giusto       | 0.386  | cold   | raffreddore  | 0.287  |
| lift   | ascensore    | 0.459  | cross  | croce        | 0.432  |
| lift   | sollevare    | 0.538  | cross  | attraversare | 0.34   |
| lead   | dirigere     | 0.184  |        |              |        |

## Hypothesis 2: L2-L2 word list with cosine similarity scores

### Monolingual word embeddings (Vecmap):

|                      |        |                       |        |
|----------------------|--------|-----------------------|--------|
| banca riva           | 0.026  | colpire sciopero      | 0.159  |
| banca sponda         | 0.11   | attacco sciopero      | 0.208  |
| banca argine         | -0.028 | giù piumino           | 0.183  |
| riva sponda          | 0.55   | giù caccia            | 0.095  |
| riva argine          | 0.335  | giù chiuso            | 0.063  |
| palla ballo          | 0.142  | piumino caccia        | 0.111  |
| data appuntamento    | 0.02   | piumino chiuso        | 0.113  |
| cambio moneta        | 0.216  | caccia chiuso         | 0.058  |
| cambio cambiare      | 0.388  | posto paletto         | 0.232  |
| cambio resto         | 0.135  | libero gratuito       | 0.376  |
| moneta cambiare      | 0.09   | germoglio tirare      | -0.024 |
| moneta resto         | 0.099  | pozzo bene            | 0.016  |
| cambiare resto       | 0.195  | fuoco licenziare      | -0.084 |
| foglio lenzuola      | 0.089  | caldo piccante        | 0.259  |
| foglio lastra        | 0.187  | ultimo durare         | 0.13   |
| foglio telo          | 0.167  | posto pallino         | 0.207  |
| lenzuola lastra      | 0.172  | posto puntino         | 0.173  |
| lenzuola telo        | 0.406  | posto macchiato       | 0.059  |
| lastra telo          | 0.389  | posto notare          | 0.034  |
| parte separare       | 0.084  | posto individuare     | 0.07   |
| popolo persone       | 0.121  | pallino puntino       | 0.267  |
| legno bosco          | 0.251  | pallino macchiato     | 0.073  |
| odorato puzza        | 0.261  | pallino notare        | 0.101  |
| blocco ceppo         | 0.158  | pallino individuare   | -0.004 |
| blocco isolato       | 0.226  | puntino macchiato     | 0.126  |
| blocco cubo          | 0.158  | puntino notare        | 0.066  |
| blocco bloccare      | 0.404  | puntino individuare   | -0.001 |
| blocco ostacolare    | 0.14   | macchiato notare      | -0.015 |
| ceppo isolato        | 0.241  | macchiato individuare | 0.033  |
| ceppo cubo           | 0.08   | notare individuare    | 0.227  |
| ceppo bloccare       | -0.004 | rubinetto rintocco    | 0.088  |
| ceppo ostacolare     | 0.008  | rubinetto colpo       | 0.067  |
| isolato cubo         | 0.121  | rubinetto battere     | 0.025  |
| isolato bloccare     | 0.118  | rintocco colpo        | 0.177  |
| isolato ostacolare   | 0.117  | rintocco battere      | 0.208  |
| cubo bloccare        | 0.01   | colpo battere         | 0.176  |
| cubo ostacolare      | -0.068 | bar sbarra            | 0.214  |
| bloccare ostacolare  | 0.518  | cravatta legare       | 0.202  |
| prezzo costo         | 0.636  | francobollo stampo    | 0.116  |
| grado voto           | -0.008 | fiera biondo          | -0.01  |
| primavera molla      | 0.056  | fiera chiaro          | -0.022 |
| giocare suonare      | 0.378  | fiera giusto          | 0.068  |
| chiaro leggero       | 0.195  | fiera equo            | 0.141  |
| blu azzurro          | 0.497  | biondo chiaro         | 0.153  |
| blu celeste          | 0.247  | biondo giusto         | 0.054  |
| blu triste           | 0.156  | biondo equo           | -0.045 |
| azzurro celeste      | 0.223  | chiaro giusto         | 0.268  |
| azzurro triste       | 0.16   | chiaro equo           | 0.117  |
| celeste triste       | 0.066  | giusto equo           | 0.391  |
| disegnare pareggiare | 0.144  | treno addestrare      | -0.033 |
| autunno cadere       | 0.112  | lampo catenaccio      | 0.23   |
| destra giusto        | 0.062  | lampo serratura       | 0.177  |
| ascensore sollevare  | 0.056  | catenaccio serratura  | 0.303  |
| dirigere piombo      | 0.039  | freddo raffreddore    | 0.363  |
| colpire attacco      | 0.413  | croce attraversare    | 0.009  |

## Cross-lingual word embeddings (Vecmap):

|                 |              |        |  |
|-----------------|--------------|--------|--|
| banca           | riva         | 0.029  |  |
| banca           | sponda       | 0.172  |  |
| banca           | argine       | 0.047  |  |
| riva            | sponda       | 0.556  |  |
| riva            | argine       | 0.328  |  |
| palla           | ballo        | 0.166  |  |
| data            | appuntamento | 0.101  |  |
| cambio          | moneta       | 0.291  |  |
| cambio          | cambiare     | 0.411  |  |
| cambio          | resto        | 0.132  |  |
| moneta          | cambiare     | 0.072  |  |
| moneta          | resto        | 0.15   |  |
| cambiare        | resto        | 0.187  |  |
| foglio          | lenzuola     | 0.124  |  |
| foglio          | lastra       | 0.241  |  |
| foglio          | telo         | 0.17   |  |
| lenzuola        | lastra       | 0.168  |  |
| lenzuola        | telo         | 0.425  |  |
| lastra          | telo         | 0.473  |  |
| parte           | separare     | 0.114  |  |
| popolo          | persone      | 0.241  |  |
| legno           | bosco        | 0.249  |  |
| odorato         | puzza        | 0.222  |  |
| blocco          | ceppo        | 0.147  |  |
| blocco          | isolato      | 0.26   |  |
| blocco          | cubo         | 0.205  |  |
| blocco          | bloccare     | 0.496  |  |
| blocco          | ostacolare   | 0.233  |  |
| ceppo           | isolato      | 0.248  |  |
| ceppo           | cubo         | 0.038  |  |
| ceppo           | bloccare     | -0.008 |  |
| ceppo           | ostacolare   | 0.014  |  |
| isolato         | cubo         | 0.1    |  |
| isolato         | bloccare     | 0.153  |  |
| isolato         | ostacolare   | 0.162  |  |
| cubo            | bloccare     | 0.013  |  |
| cubo            | ostacolare   | -0.053 |  |
| bloccare        | ostacolare   | 0.594  |  |
| prezzo          | costo        | 0.699  |  |
| grado           | voto         | 0.035  |  |
| primavera       | molla        | 0.035  |  |
| giocare         | suonare      | 0.374  |  |
| chiaro          | leggero      | 0.198  |  |
| blu             | azzurro      | 0.562  |  |
| blu             | celeste      | 0.263  |  |
| blu             | triste       | 0.127  |  |
| azzurro         | celeste      | 0.209  |  |
| azzurro         | triste       | 0.147  |  |
| celeste         | triste       | 0.034  |  |
| disegnare       | pareggiare   | 0.185  |  |
| autunno         | cadere       | 0.096  |  |
| destra          | giusto       | 0.011  |  |
| ascensore       | sollevare    | 0.061  |  |
| dirigere        | piombo       | -0.01  |  |
| colpire         | attacco      | 0.51   |  |
| colpire         | sciopero     | 0.21   |  |
| attacco         | sciopero     | 0.292  |  |
| giù             | piumino      | 0.071  |  |
| giù             | caccia       | 0.028  |  |
| giù             | chiuso       | 0.036  |  |
| piumino         | caccia       | 0.075  |  |
| piumino         | chiuso       | 0.027  |  |
| caccia          | chiuso       | 0.051  |  |
| posto           | paletto      | 0.254  |  |
| libero          | gratuito     | 0.408  |  |
| germoglio       | tirare       | -0.057 |  |
| pozzo           | bene         | -0.019 |  |
| fuoco           | licenziare   | -0.06  |  |
| caldo           | piccante     | 0.246  |  |
| ultimo          | durare       | 0.199  |  |
| posto           | pallino      | 0.217  |  |
| posto           | puntino      | 0.243  |  |
| posto           | macchiato    | 0.01   |  |
| posto           | notare       | 0.075  |  |
| posto           | individuare  | 0.091  |  |
| pallino         | puntino      | 0.319  |  |
| pallino         | macchiato    | 0.065  |  |
| pallino         | notare       | 0.173  |  |
| pallino         | individuare  | 0.022  |  |
| puntino         | macchiato    | 0.103  |  |
| puntino         | notare       | 0.075  |  |
| puntino         | individuare  | 0.043  |  |
| macchiato       | notare       | -0.02  |  |
| macchiato       | individuare  | -0.057 |  |
| notare          | individuare  | 0.312  |  |
| rubinetto       | rintocco     | -0.004 |  |
| rubinetto       | colpo        | 0.055  |  |
| rubinetto       | battere      | -0.045 |  |
| rintoccocolpo   |              | 0.105  |  |
| rintoccobattere |              | 0.153  |  |
| colpo           | battere      | 0.271  |  |
| bar             | sbarra       | 0.25   |  |
| cravatta        | legare       | 0.151  |  |
| francobollo     | stampo       | 0.108  |  |
| fiera           | biondo       | 0.0    |  |
| fiera           | chiaro       | -0.014 |  |
| fiera           | giusto       | 0.075  |  |
| fiera           | equo         | 0.163  |  |
| biondo          | chiaro       | 0.045  |  |
| biondo          | giusto       | -0.042 |  |
| biondo          | equo         | -0.107 |  |
| chiaro          | giusto       | 0.298  |  |
| chiaro          | equo         | 0.202  |  |
| giusto          | equo         | 0.44   |  |
| treno           | addestrare   | -0.03  |  |
| lampo           | catenaccio   | 0.174  |  |
| lampo           | serratura    | 0.215  |  |
| catenaccio      | serratura    | 0.311  |  |
| freddo          | raffreddore  | 0.395  |  |
| croce           | attraversare | 0.068  |  |

## Cross-lingual word embeddings (concepts):

|           |              |        |                |              |        |
|-----------|--------------|--------|----------------|--------------|--------|
| banca     | riva         | 0.1    | colpire        | sciopero     | 0.133  |
| banca     | sponda       | 0.188  | attacco        | sciopero     | 0.319  |
| banca     | argine       | 0.031  | giù            | piumino      | 0.161  |
| riva      | sponda       | 0.904  | giù            | caccia       | 0.164  |
| riva      | argine       | 0.56   | giù            | chiuso       | 0.191  |
| palla     | ballo        | 0.035  | piumino        | caccia       | 0.148  |
| data      | appuntamento | 0.068  | piumino        | chiuso       | 0.14   |
| cambio    | moneta       | 0.284  | caccia         | chiuso       | -0.006 |
| cambio    | cambiare     | 0.363  | posto          | paletto      | 0.27   |
| cambio    | resto        | 0.091  | libero         | gratuito     | 0.337  |
| moneta    | cambiare     | -0.084 | germoglio      | tirare       | 0.09   |
| moneta    | resto        | 0.011  | pozzo          | bene         | -0.075 |
| cambiare  | resto        | 0.023  | fuoco          | licenziare   | -0.034 |
| foglio    | lenzuola     | 0.252  | caldo          | piccante     | 0.487  |
| foglio    | lastra       | 0.423  | ultimo         | durare       | 0.099  |
| foglio    | telo         | 0.433  | posto          | pallino      | 0.147  |
| lenzuola  | lastra       | 0.236  | posto          | puntino      | 0.133  |
| lenzuola  | telo         | 0.538  | posto          | macchiato    | -0.003 |
| lastra    | telo         | 0.524  | posto          | notare       | -0.017 |
| parte     | separare     | 0.016  | posto          | individuare  | -0.107 |
| popolo    | persone      | 0.173  | pallino        | puntino      | 0.488  |
| legno     | bosco        | 0.168  | pallino        | macchiato    | 0.085  |
| odorato   | puzza        | 0.278  | pallino        | notare       | 0.099  |
| blocco    | ceppo        | 0.209  | pallino        | individuare  | 0.01   |
| blocco    | isolato      | 0.246  | puntino        | macchiato    | 0.043  |
| blocco    | cubo         | 0.309  | puntino        | notare       | 0.144  |
| blocco    | bloccare     | 0.449  | puntino        | individuare  | 0.1    |
| blocco    | ostacolare   | 0.227  | macchiato      | notare       | 0.252  |
| ceppo     | isolato      | 0.231  | macchiato      | individuare  | 0.063  |
| ceppo     | cubo         | 0.083  | notare         | individuare  | 0.456  |
| ceppo     | bloccare     | -0.11  | rubinetto      | rintocco     | 0.133  |
| ceppo     | ostacolare   | -0.181 | rubinetto      | colpo        | 0.166  |
| isolato   | cubo         | 0.184  | rubinetto      | battere      | 0.054  |
| isolato   | bloccare     | 0.155  | rintocco       | colpo        | 0.115  |
| isolato   | ostacolare   | 0.073  | rintocco       | battere      | 0.104  |
| cubo      | bloccare     | 0.064  | colpo          | battere      | 0.33   |
| cubo      | ostacolare   | -0.015 | bar            | sbarra       | 0.139  |
| bloccare  | ostacolare   | 0.805  | cravattalegare |              | 0.201  |
| prezzo    | costo        | 0.843  | francobollo    | stampo       | 0.094  |
| grado     | voto         | 0.155  | fiera          | biondo       | 0.062  |
| primavera | molla        | -0.148 | fiera          | chiaro       | -0.119 |
| giocare   | suonare      | 0.494  | fiera          | giusto       | -0.007 |
| chiaro    | leggero      | 0.309  | fiera          | equo         | 0.078  |
| blu       | azzurro      | 0.766  | biondo         | chiaro       | 0.188  |
| blu       | celeste      | 0.407  | biondo         | giusto       | 0.03   |
| blu       | triste       | 0.073  | biondo         | equo         | -0.102 |
| azzurro   | celeste      | 0.405  | chiaro         | giusto       | 0.324  |
| azzurro   | triste       | 0.099  | chiaro         | equo         | 0.13   |
| celeste   | triste       | 0.201  | giusto         | equo         | 0.417  |
| disegnare | pareggiare   | 0.204  | treno          | addestrare   | 0.033  |
| autunno   | cadere       | -0.043 | lampo          | catenaccio   | 0.172  |
| destra    | giusto       | -0.04  | lampo          | serratura    | 0.305  |
| ascensore | sollevare    | 0.158  | catenaccio     | serratura    | 0.222  |
| dirigere  | piombo       | -0.224 | freddo         | raffreddore  | 0.348  |
| colpire   | attacco      | 0.523  | croce          | attraversare | -0.0   |

## False friends with cosine similarity scores

### Vecmap:

|               |             |        |              |              |        |
|---------------|-------------|--------|--------------|--------------|--------|
| accident      | accidente   | 0.347  | misery       | miseria      | 0.655  |
| actual        | attuale     | 0.353  | morbid       | morbido      | 0.022  |
| actually      | attualmente | 0.295  | novel        | novella      | 0.342  |
| addiction     | addizione   | -0.037 | occur        | occorrere    | 0.387  |
| advertise     | avvertire   | 0.26   | ostrich      | ostrica      | 0.274  |
| advice        | avviso      | 0.219  | parent       | parente      | 0.255  |
| affluent      | affluente   | 0.305  | patent       | patente      | 0.229  |
| argument      | argomento   | 0.478  | pavement     | pavimento    | 0.507  |
| arrange       | arrangiare  | 0.347  | petrol       | petrolio     | 0.424  |
| attend        | attendere   | 0.343  | policy       | polizia      | 0.215  |
| attic         | attico      | 0.37   | portfolio    | portafoglio  | 0.636  |
| attitude      | attitudine  | 0.559  | preservative | preservativo | 0.335  |
| bald          | baldo       | 0.166  | presumption  | presunzione  | 0.564  |
| barracks      | baracca     | 0.374  | pretend      | pretendere   | 0.486  |
| barrister     | barista     | 0.314  | process      | processare   | 0.18   |
| bell          | bello       | 0.054  | puncture     | puntura      | 0.362  |
| brave         | bravo       | 0.286  | rape         | rapa         | -0.01  |
| camera        | camera      | 0.128  | rate         | rate         | 0.443  |
| canteen       | cantina     | 0.222  | record       | ricordo      | 0.201  |
| car           | carro       | 0.37   | regard       | riguardare   | 0.411  |
| casino        | casino      | 0.256  | rest         | resto        | 0.646  |
| casual        | casuale     | 0.319  | retain       | ritenere     | 0.289  |
| caution       | cauzione    | 0.096  | rotten       | rotto        | 0.247  |
| code          | coda        | 0.108  | rude         | rude         | 0.312  |
| cold          | caldo       | 0.618  | rumor        | rumore       | 0.09   |
| college       | collegio    | 0.428  | rumour       | rumore       | 0.104  |
| comprehensive | comprensivo | 0.255  | sane         | sano         | 0.337  |
| con           | con         | 0.007  | scholar      | scolaro      | 0.261  |
| concurrence   | concorrenza | -0.027 | sensible     | sensibile    | 0.292  |
| confetti      | confetti    | 0.386  | sensitive    | sensitivo    | 0.207  |
| confidence    | confidenza  | 0.465  | spill        | spillo       | 0.028  |
| confront      | confrontare | 0.368  | stamp        | stampa       | 0.183  |
| consistent    | consistente | 0.274  | storm        | stormo       | 0.121  |
| corpse        | corpo       | 0.347  | suggestive   | suggestivo   | 0.308  |
| crude         | crudo       | 0.257  | sympathetic  | simpatico    | 0.27   |
| dare          | dare        | 0.066  | tap          | tappo        | 0.346  |
| delusion      | delusione   | 0.285  | taste        | tasto        | -0.006 |
| disgrace      | disgrazia   | 0.445  | terrific     | terrificante | 0.472  |
| educated      | educato     | 0.485  | test         | testo        | 0.098  |
| estate        | estate      | 0.261  | ultimate     | ultimato     | 0.047  |
| factory       | fattoria    | 0.275  | vacancy      | vacanza      | 0.236  |
| fastidious    | fastidioso  | 0.274  | verse        | verso        | 0.008  |
| firm          | firma       | 0.114  |              |              |        |
| furniture     | fornitura   | 0.25   |              |              |        |
| gracious      | grazioso    | 0.363  |              |              |        |
| gross         | grosso      | 0.151  |              |              |        |
| injury        | ingiuria    | 0.315  |              |              |        |
| lecture       | lettura     | 0.274  |              |              |        |
| library       | libreria    | 0.546  |              |              |        |
| license       | licenziare  | 0.182  |              |              |        |
| lurid         | lurido      | 0.212  |              |              |        |
| luxury        | lussuria    | 0.196  |              |              |        |
| magazine      | magazzino   | 0.086  |              |              |        |
| mansion       | mansione    | 0.055  |              |              |        |
| mess          | messa       | 0.079  |              |              |        |

## Concepts:

|               |              |        |  |
|---------------|--------------|--------|--|
| accident      | accidente    | 0.124  |  |
| actual        | attuale      | 0.063  |  |
| actually      | attualmente  | -0.189 |  |
| addiction     | addizione    | -0.103 |  |
| advertise     | avvertire    | 0.331  |  |
| advice        | avviso       | 0.378  |  |
| affluent      | affluente    | 0.163  |  |
| argument      | argomento    | 0.469  |  |
| arrange       | arrangiare   | 0.484  |  |
| attend        | attendere    | 0.427  |  |
| attic         | attico       | 0.574  |  |
| attitude      | attitudine   | 0.551  |  |
| bald          | baldo        | 0.234  |  |
| barracks      | baracca      | 0.411  |  |
| barrister     | barista      | 0.157  |  |
| bell          | bello        | -0.106 |  |
| brave         | bravo        | 0.403  |  |
| camera        | camera       | 0.117  |  |
| canteen       | cantina      | 0.368  |  |
| car           | carro        | 0.462  |  |
| casino        | casino       | 0.548  |  |
| casual        | casuale      | 0.328  |  |
| caution       | cauzione     | 0.159  |  |
| code          | coda         | 0.041  |  |
| cold          | caldo        | 0.553  |  |
| college       | collegio     | 0.499  |  |
| comprehensive | comprendivo  | 0.348  |  |
| con           | con          | 0.095  |  |
| concurrence   | concorrenza  | 0.067  |  |
| confetti      | confetti     | 0.438  |  |
| confidence    | confidenza   | 0.413  |  |
| confront      | confrontare  | 0.269  |  |
| consistent    | consistente  | 0.402  |  |
| corpse        | corpo        | 0.46   |  |
| crude         | crudo        | 0.476  |  |
| dare          | dare         | 0.227  |  |
| delusion      | delusione    | 0.328  |  |
| disgraced     | disgrazia    | 0.614  |  |
| educated      | educato      | 0.675  |  |
| estate        | estate       | -0.008 |  |
| factory       | fattoria     | 0.364  |  |
| fastidious    | fastidioso   | 0.323  |  |
| firm          | firma        | 0.018  |  |
| furniture     | fornitura    | 0.165  |  |
| gracious      | grazioso     | 0.367  |  |
| gross         | grosso       | 0.028  |  |
| injury        | ingiuria     | 0.11   |  |
| lecture       | lettura      | 0.363  |  |
| library       | libreria     | 0.641  |  |
| license       | licenziare   | 0.168  |  |
| lurid         | lurido       | 0.265  |  |
| luxury        | lussuria     | 0.133  |  |
| magazine      | magazzino    | -0.008 |  |
| mansion       | mansione     | 0.075  |  |
| mess          | messa        | 0.033  |  |
| misery        | miseria      | 0.702  |  |
| morbid        | morbido      | 0.115  |  |
| novel         | novella      | 0.609  |  |
| occur         | occorrere    | 0.547  |  |
| ostrich       | ostrica      | 0.306  |  |
| parent        | parente      | 0.13   |  |
| patent        | patente      | 0.377  |  |
| pavement      | pavimento    | 0.553  |  |
| petrol        | petrolio     | 0.355  |  |
| policy        | polizia      | 0.208  |  |
| portfolio     | portafoglio  | 0.601  |  |
| preservative  | preservativo | 0.29   |  |
| presumption   | presunzione  | 0.69   |  |
| pretend       | pretendere   | 0.348  |  |
| process       | processare   | 0.208  |  |
| puncture      | puntura      | 0.437  |  |
| rape          | rapa         | -0.069 |  |
| rate          | rate         | 0.548  |  |
| record        | ricordo      | 0.04   |  |
| regard        | riguardare   | 0.494  |  |
| rest          | resto        | 0.605  |  |
| retain        | ritenere     | 0.273  |  |
| rotten        | rotto        | 0.105  |  |
| rude          | rude         | 0.579  |  |
| rumor         | rumore       | 0.144  |  |
| rumour        | rumore       | 0.127  |  |
| sane          | sano         | 0.385  |  |
| scholar       | scolaro      | 0.274  |  |
| sensible      | sensibile    | 0.537  |  |
| sensitive     | sensitivo    | 0.134  |  |
| spill         | spillo       | 0.063  |  |
| stamp         | stampa       | 0.239  |  |
| storm         | stormo       | 0.214  |  |
| suggestive    | suggestivo   | 0.326  |  |
| sympathetic   | simpatico    | 0.319  |  |
| tap           | tappo        | 0.354  |  |
| taste         | tasto        | -0.008 |  |
| terrific      | terrificante | 0.531  |  |
| test          | testo        | -0.017 |  |
| ultimate      | ultimato     | -0.009 |  |
| vacancy       | vacanza      | 0.052  |  |
| verse         | verso        | -0.058 |  |



## FastText:

|               |             |       |
|---------------|-------------|-------|
| accident      | accidente   | 0.52  |
| actual        | attuale     | 0.496 |
| actually      | attualmente | 0.563 |
| addiction     | addizione   | 0.18  |
| advertise     | avvertire   | 0.42  |
| advice        | avviso      | 0.389 |
| affluent      | affluente   | 0.215 |
| argument      | argomento   | 0.606 |
| arrange       | arrangiare  | 0.462 |
| attend        | attendere   | 0.457 |
| attic         | attico      | 0.343 |
| attitude      | attitudine  | 0.725 |
| bald          | baldo       | 0.286 |
| barracks      | baracca     | 0.472 |
| barrister     | barista     | 0.404 |
| bell          | bello       | 0.241 |
| brave         | bravo       | 0.437 |
| camera        | camera      | 0.358 |
| canteen       | cantina     | 0.276 |
| car           | carro       | 0.449 |
| casino        | casino      | 0.608 |
| casual        | casuale     | 0.458 |
| caution       | cauzione    | 0.175 |
| code          | coda        | 0.217 |
| cold          | caldo       | 0.748 |
| college       | collegio    | 0.526 |
| comprehensive | comprendivo | 0.395 |
| con           | con         | 0.247 |
| concurrence   | concorrenza | 0.144 |
| confetti      | confetti    | 0.533 |
| confidence    | confidenza  | 0.618 |
| confront      | confrontare | 0.441 |
| consistent    | consistente | 0.515 |
| corpse        | corpo       | 0.484 |
| crude         | crudo       | 0.418 |
| dare          | dare        | 0.477 |
| delusion      | delusione   | 0.454 |
| disgraced     | disgrazia   | 0.571 |
| educated      | educato     | 0.666 |
| estate        | estate      | 0.313 |
| factory       | fattoria    | 0.448 |
| fastidious    | fastidioso  | 0.33  |
| firm          | firma       | 0.261 |
| furniture     | fornitura   | 0.355 |
| gracious      | grazioso    | 0.475 |
| gross         | grosso      | 0.373 |
| injury        | ingiuria    | 0.343 |
| lecture       | lettura     | 0.439 |
| library       | libreria    | 0.694 |
| license       | licenziare  | 0.316 |
| lurid         | lurido      | 0.345 |
| luxury        | lussuria    | 0.36  |
| magazine      | magazzino   | 0.191 |
| mansion       | mansione    | 0.164 |
| mess          | messa       | 0.335 |

|              |              |       |
|--------------|--------------|-------|
| misery       | miseria      | 0.731 |
| morbid       | morbido      | 0.22  |
| novel        | novella      | 0.549 |
| occur        | occorrere    | 0.547 |
| ostrich      | ostrica      | 0.351 |
| parent       | parente      | 0.497 |
| patent       | patente      | 0.339 |
| pavement     | pavimento    | 0.521 |
| petrol       | petrolio     | 0.515 |
| policy       | polizia      | 0.289 |
| portfolio    | portafoglio  | 0.694 |
| preservative | preservativo | 0.295 |
| presumption  | presunzione  | 0.691 |
| pretend      | pretendere   | 0.629 |
| process      | processare   | 0.468 |
| puncture     | puntura      | 0.515 |
| rape         | rapa         | 0.193 |
| rate         | rate         | 0.511 |
| record       | ricordo      | 0.344 |
| regard       | riguardare   | 0.57  |
| rest         | resto        | 0.771 |
| retain       | ritenere     | 0.477 |
| rotten       | rotto        | 0.393 |
| rude         | rude         | 0.545 |
| rumor        | rumore       | 0.296 |
| rumour       | rumore       | 0.293 |
| sane         | sano         | 0.526 |
| scholar      | scolaro      | 0.421 |
| sensible     | sensibile    | 0.483 |
| sensitive    | sensitivo    | 0.24  |
| spill        | spillo       | 0.242 |
| stamp        | stampa       | 0.344 |
| storm        | stormo       | 0.331 |
| suggestive   | suggestivo   | 0.532 |
| sympathetic  | simpatico    | 0.471 |
| tap          | tappo        | 0.379 |
| taste        | tasto        | 0.163 |
| terrific     | terrificante | 0.513 |
| test         | testo        | 0.312 |
| ultimate     | ultimato     | 0.24  |
| vacancy      | vacanza      | 0.222 |
| verse        | verso        | 0.133 |

## Real translations with cosine similarity scores

### Vecmap:

|               |                |       |              |                 |       |
|---------------|----------------|-------|--------------|-----------------|-------|
| accident      | infortunio     | 0.556 | dare         | sfidare         | 0.221 |
| actual        | effettivo      | 0.449 | delusion     | allucinazione   | 0.524 |
| actual        | reale          | 0.569 | delusion     | illusione       | 0.546 |
| actually      | effettivamente | 0.682 | disgraced    | disonore        | 0.597 |
| actually      | veramente      | 0.494 | disgrace     | vergogna        | 0.578 |
| addiction     | assuefazione   | 0.458 | educated     | colto           | 0.247 |
| addiction     | dipendenza     | 0.533 | educated     | istruito        | 0.502 |
| advertise     | pubblicizzare  | 0.7   | estate       | proprietà       | 0.428 |
| advice        | consulenza     | 0.631 | factory      | fabbrica        | 0.801 |
| affluent      | prospero       | 0.232 | factory      | officina        | 0.563 |
| affluent      | ricco          | 0.338 | fastidious   | meticoloso      | 0.399 |
| argument      | discussione    | 0.432 | fastidious   | pignolo         | 0.316 |
| argument      | litigio        | 0.245 | firm         | azienda         | 0.549 |
| argument      | motivo         | 0.359 | firm         | stabile         | 0.274 |
| arrange       | disporre       | 0.502 | furniture    | arredamento     | 0.664 |
| arrange       | organizzare    | 0.552 | furniture    | mobili          | 0.511 |
| arrange       | sistemare      | 0.386 | gracious     | benevolo        | 0.392 |
| attend        | assistere      | 0.56  | gross        | lordo           | 0.445 |
| attend        | frequentare    | 0.605 | gross        | schifoso        | 0.097 |
| attic         | soffitta       | 0.494 | gross        | totale          | 0.393 |
| attitude      | atteggiamento  | 0.78  | injury       | ferita          | 0.446 |
| bald          | calvo          | 0.303 | injury       | lesione         | 0.577 |
| bald          | pelato         | 0.318 | lecture      | conferenza      | 0.409 |
| barracks      | caserma        | 0.637 | lecture      | lezione         | 0.583 |
| barrister     | avvocato       | 0.605 | library      | biblioteca      | 0.797 |
| bell          | campana        | 0.374 | license      | autorizzare     | 0.281 |
| bell          | campanello     | 0.378 | lurid        | livido          | 0.279 |
| brave         | coraggioso     | 0.568 | luxury       | lusso           | 0.747 |
| brave         | valoroso       | 0.459 | magazine     | giornale        | 0.659 |
| camera        | videocamera    | 0.672 | magazine     | rivista         | 0.69  |
| canteen       | borraccia      | 0.275 | mansion      | residenza       | 0.383 |
| canteen       | mensa          | 0.607 | mansion      | villa           | 0.58  |
| car           | automobile     | 0.775 | mess         | confusione      | 0.372 |
| car           | macchina       | 0.517 | misery       | sofferenza      | 0.571 |
| casino        | casinò         | 0.624 | morbid       | morbosità       | 0.489 |
| casual        | disinvolto     | 0.428 | novel        | romanzo         | 0.794 |
| casual        | informale      | 0.456 | occur        | accadere        | 0.568 |
| caution       | attenzione     | 0.38  | occur        | capitare        | 0.511 |
| code          | codice         | 0.726 | ostrich      | struzzo         | 0.415 |
| code          | prefisso       | 0.358 | parent       | genitore        | 0.65  |
| cold          | freddo         | 0.689 | patent       | brevetto        | 0.712 |
| college       | università     | 0.599 | pavement     | marciapiede     | 0.675 |
| comprehensive | esauriente     | 0.586 | petrol       | benzina         | 0.643 |
| con           | imbrogliare    | 0.232 | policy       | politica        | 0.655 |
| con           | truffa         | 0.312 | portfolio    | portadocumenti  | 0.102 |
| concurrence   | coincidenza    | 0.183 | preservative | conservante     | 0.666 |
| confetti      | coriandoli     | 0.532 | presumption  | presupposizione | 0.394 |
| confidence    | fiducia        | 0.739 | presumption  | supposizione    | 0.378 |
| confront      | affrontare     | 0.641 | presumption  | ipotesi         | 0.388 |
| consistent    | coerente       | 0.722 | pretend      | fingere         | 0.599 |
| consistent    | costante       | 0.436 | pretend      | simulare        | 0.181 |
| corpse        | cadavere       | 0.717 | process      | elaborare       | 0.195 |
| crude         | grezzo         | 0.442 | process      | procedura       | 0.576 |
| crude         | volgare        | 0.252 | puncture     | bucare          | 0.183 |
| dare          | osare          | 0.336 | puncture     | foratura        | 0.427 |

|                     |                 |       |  |
|---------------------|-----------------|-------|--|
| rape                | stupro          | 0.68  |  |
| rate                | tasso           | 0.7   |  |
| rate                | velocità        | 0.405 |  |
| record              | disco           | 0.336 |  |
| record              | primato         | 0.397 |  |
| record              | registro        | 0.315 |  |
| regard              | considerare     | 0.475 |  |
| rest                | riposo          | 0.332 |  |
| retain              | conservare      | 0.732 |  |
| rotten              | marcio          | 0.291 |  |
| rude                | maleducato      | 0.528 |  |
| rude                | scortese        | 0.506 |  |
| rumor               | voce            | 0.091 |  |
| rumor               | pettegolezso    | 0.303 |  |
| rumour              | pettegolezso    | 0.339 |  |
| rumour              | voce            | 0.117 |  |
| sane                | equilibrato     | 0.221 |  |
| scholar             | studioso        | 0.669 |  |
| sensibleragionevole |                 | 0.518 |  |
| sensiblesensato     |                 | 0.562 |  |
| sensitive           | delicato        | 0.635 |  |
| sensitive           | sensibile       | 0.671 |  |
| spill               | rovesciare      | 0.188 |  |
| spill               | versare         | 0.291 |  |
| stamp               | francobollo     | 0.491 |  |
| stamp               | timbro          | 0.263 |  |
| storm               | tempesta        | 0.685 |  |
| suggestive          | allusivo        | 0.419 |  |
| suggestive          | indicativo      | 0.24  |  |
| sympathetic         | compassionevole | 0.362 |  |
| sympathetic         | comprensivo     | 0.108 |  |
| tap                 | colpetto        | 0.281 |  |
| tap                 | rubinetto       | 0.452 |  |
| taste               | gusto           | 0.722 |  |
| taste               | sapore          | 0.636 |  |
| terrific            | fantastico      | 0.511 |  |
| terrific            | magnifico       | 0.416 |  |
| test                | esame           | 0.426 |  |
| ultimate            | fondamentale    | 0.43  |  |
| vacancyvuoto        |                 | 0.284 |  |
| verse               | strofa          | 0.564 |  |

## Concepts:

|               |                 |       |  |
|---------------|-----------------|-------|--|
| actual        | effettivo       | 0.37  |  |
| accident      | infortunio      | 0.405 |  |
| actual        | reale           | 0.361 |  |
| actually      | effettivamente  | 0.579 |  |
| actually      | veramente       | 0.557 |  |
| addiction     | assuefazione    | 0.434 |  |
| addiction     | dipendenza      | 0.443 |  |
| advertise     | pubblicizzare   | 0.735 |  |
| advice        | consulenza      | 0.425 |  |
| affluent      | prospero        | 0.11  |  |
| affluent      | ricco           | 0.433 |  |
| argument      | discussione     | 0.591 |  |
| argument      | litigio         | 0.348 |  |
| argument      | motivo          | 0.378 |  |
| arrange       | disporre        | 0.429 |  |
| arrange       | organizzare     | 0.65  |  |
| arrange       | sistemare       | 0.538 |  |
| attend        | assistere       | 0.645 |  |
| attend        | frequentare     | 0.673 |  |
| attic         | soffitta        | 0.621 |  |
| attitude      | atteggiamento   | 0.755 |  |
| bald          | calvo           | 0.326 |  |
| bald          | pelato          | 0.397 |  |
| barracks      | caserma         | 0.687 |  |
| barrister     | avvocato        | 0.481 |  |
| bell          | campana         | 0.398 |  |
| bell          | campanello      | 0.242 |  |
| brave         | coraggioso      | 0.701 |  |
| brave         | valoroso        | 0.626 |  |
| camera        | videocamera     | 0.677 |  |
| canteen       | borraccia       | 0.201 |  |
| canteen       | mensa           | 0.537 |  |
| car           | automobile      | 0.661 |  |
| car           | macchina        | 0.576 |  |
| casino        | casinò          | 0.729 |  |
| casual        | disinvolto      | 0.479 |  |
| casual        | informale       | 0.435 |  |
| caution       | attenzione      | 0.113 |  |
| code          | codice          | 0.722 |  |
| code          | prefisso        | 0.415 |  |
| cold          | freddo          | 0.624 |  |
| college       | università      | 0.662 |  |
| comprehensive | esauriente      | 0.525 |  |
| con           | imbrogliare     | 0.152 |  |
| con           | truffa          | 0.194 |  |
| concurrence   | coincidenza     | 0.113 |  |
| confetti      | coriandoli      | 0.573 |  |
| confidence    | fiducia         | 0.672 |  |
| confront      | affrontare      | 0.66  |  |
| consistent    | coerente        | 0.67  |  |
| consistent    | costante        | 0.55  |  |
| corpse        | cadavere        | 0.791 |  |
| crude         | grezzo          | 0.564 |  |
| crude         | volgare         | 0.293 |  |
| dare          | osare           | 0.4   |  |
| dare          | sfidare         | 0.288 |  |
| delusion      | allucinazione   | 0.501 |  |
| delusion      | illusione       | 0.515 |  |
| disgraced     | disonore        | 0.641 |  |
| disgrace      | vergogna        | 0.607 |  |
| educated      | colto           | 0.279 |  |
| educated      | istruito        | 0.596 |  |
| estate        | proprietà       | 0.527 |  |
| factory       | fabbrica        | 0.764 |  |
| factory       | officina        | 0.624 |  |
| fastidious    | meticoloso      | 0.491 |  |
| fastidious    | pignolo         | 0.531 |  |
| firm          | azienda         | 0.61  |  |
| firm          | stabile         | 0.122 |  |
| furniture     | arredamento     | 0.742 |  |
| furniture     | mobili          | 0.637 |  |
| gracious      | benevolo        | 0.507 |  |
| gross         | lordo           | 0.483 |  |
| injury        | ferita          | 0.455 |  |
| injury        | lesione         | 0.526 |  |
| lecture       | conferenza      | 0.36  |  |
| lecture       | lezione         | 0.414 |  |
| library       | biblioteca      | 0.743 |  |
| license       | autorizzare     | 0.259 |  |
| lurid         | livido          | 0.245 |  |
| luxury        | lusso           | 0.789 |  |
| magazine      | giornale        | 0.596 |  |
| magazine      | rivista         | 0.746 |  |
| mansion       | residenza       | 0.684 |  |
| mansion       | villa           | 0.718 |  |
| mess          | confusione      | 0.192 |  |
| misery        | sofferenza      | 0.69  |  |
| morbid        | morboso         | 0.465 |  |
| novel         | romanzo         | 0.825 |  |
| occur         | accadere        | 0.635 |  |
| occur         | capitare        | 0.571 |  |
| ostrich       | struzzo         | 0.603 |  |
| parent        | genitore        | 0.397 |  |
| patent        | brevetto        | 0.655 |  |
| pavement      | marciapiede     | 0.35  |  |
| petrol        | benzina         | 0.655 |  |
| policy        | politica        | 0.648 |  |
| preservative  | conservante     | 0.655 |  |
| presumption   | presupposizione | 0.403 |  |
| presumption   | supposizione    | 0.429 |  |
| presumption   | ipotesi         | 0.459 |  |
| pretend       | fingere         | 0.699 |  |
| pretend       | simulare        | 0.27  |  |
| process       | elaborare       | 0.291 |  |
| process       | procedura       | 0.535 |  |
| puncture      | bucare          | 0.384 |  |
| puncture      | foratura        | 0.595 |  |
| rape          | stupro          | 0.743 |  |
| rate          | tasso           | 0.701 |  |
| rate          | velocità        | 0.482 |  |

|             |                 |       |  |
|-------------|-----------------|-------|--|
| record      | disco           | 0.455 |  |
| record      | primato         | 0.414 |  |
| record      | registro        | 0.074 |  |
| regard      | considerare     | 0.525 |  |
| rest        | riposo          | 0.349 |  |
| retain      | conservare      | 0.673 |  |
| rotten      | marcio          | 0.18  |  |
| rude        | maleducato      | 0.621 |  |
| rude        | scortese        | 0.584 |  |
| rumor       | voce            | 0.174 |  |
| rumor       | pettegolezzo    | 0.455 |  |
| rumour      | pettegolezzo    | 0.424 |  |
| rumour      | voce            | 0.156 |  |
| sane        | equilibrato     | 0.212 |  |
| scholar     | studioso        | 0.718 |  |
| sensibile   | ragionevole     | 0.487 |  |
| sensibile   | sensato         | 0.389 |  |
| sensitive   | delicato        | 0.513 |  |
| sensitive   | sensibile       | 0.673 |  |
| spill       | rovesciare      | 0.135 |  |
| spill       | versare         | 0.2   |  |
| stamp       | francobollo     | 0.58  |  |
| stamp       | timbro          | 0.204 |  |
| storm       | tempesta        | 0.657 |  |
| suggestive  | allusivo        | 0.537 |  |
| suggestive  | indicativo      | 0.267 |  |
| sympathetic | compassionevole | 0.418 |  |
| sympathetic | comprensivo     | 0.064 |  |
| taste       | gusto           | 0.674 |  |
| taste       | sapore          | 0.627 |  |
| terrific    | fantastico      | 0.376 |  |
| terrific    | magnifico       | 0.167 |  |
| test        | esame           | 0.439 |  |
| ultimate    | fondamentale    | 0.335 |  |
| vacancy     | vuoto           | 0.156 |  |
| verse       | strofa          | 0.657 |  |

## FastText:

|               |                |       |
|---------------|----------------|-------|
| accident      | infortunio     | 0.561 |
| actual        | effettivo      | 0.693 |
| actual        | reale          | 0.661 |
| actually      | effettivamente | 0.848 |
| actually      | veramente      | 0.728 |
| addiction     | assuefazione   | 0.505 |
| addiction     | dipendenza     | 0.641 |
| advertise     | pubblicizzare  | 0.801 |
| advice        | consulenza     | 0.636 |
| affluent      | prospero       | 0.375 |
| affluent      | ricco          | 0.455 |
| argument      | discussione    | 0.57  |
| argument      | litigio        | 0.412 |
| argument      | motivo         | 0.494 |
| arrange       | disporre       | 0.611 |
| arrange       | organizzare    | 0.729 |
| arrange       | sistemare      | 0.52  |
| attend        | assistere      | 0.649 |
| attend        | frequentare    | 0.685 |
| attic         | soffitta       | 0.71  |
| attitude      | atteggiamento  | 0.794 |
| bald          | calvo          | 0.648 |
| bald          | pelato         | 0.424 |
| barracks      | caserma        | 0.741 |
| barrister     | avvocato       | 0.653 |
| bell          | campana        | 0.538 |
| bell          | campanello     | 0.538 |
| brave         | coraggioso     | 0.794 |
| brave         | valoroso       | 0.611 |
| camera        | videocamera    | 0.809 |
| canteen       | borraccia      | 0.43  |
| canteen       | mensa          | 0.711 |
| car           | automobile     | 0.827 |
| car           | macchina       | 0.625 |
| casino        | casinò         | 0.836 |
| casual        | disinvolto     | 0.558 |
| casual        | informale      | 0.654 |
| caution       | attenzione     | 0.542 |
| code          | codice         | 0.79  |
| code          | prefisso       | 0.337 |
| cold          | freddo         | 0.847 |
| college       | università     | 0.706 |
| comprehensive | esauriente     | 0.685 |
| con           | imbrogliare    | 0.37  |
| con           | truffa         | 0.37  |
| concurrence   | coincidenza    | 0.397 |
| confetti      | coriandoli     | 0.759 |
| confidence    | fiducia        | 0.804 |
| confront      | affrontare     | 0.738 |
| consistent    | coerente       | 0.808 |
| consistent    | costante       | 0.609 |
| corpse        | cadavere       | 0.79  |
| crude         | grezzo         | 0.518 |
| crude         | volgare        | 0.431 |
| dare          | osare          | 0.647 |

|              |                 |       |
|--------------|-----------------|-------|
| dare         | sfidare         | 0.558 |
| delusion     | allucinazione   | 0.631 |
| delusion     | illusione       | 0.718 |
| disgraced    | disonore        | 0.683 |
| disgrace     | vergogna        | 0.697 |
| educated     | colto           | 0.422 |
| educated     | istruito        | 0.635 |
| estate       | proprietà       | 0.513 |
| factory      | fabbrica        | 0.802 |
| factory      | officina        | 0.575 |
| fastidious   | meticoloso      | 0.408 |
| fastidious   | pignolo         | 0.42  |
| firm         | azienda         | 0.572 |
| firm         | stabile         | 0.366 |
| furniture    | arredamento     | 0.729 |
| furniture    | mobili          | 0.7   |
| gracious     | benevolo        | 0.516 |
| gross        | lordo           | 0.526 |
| gross        | schifoso        | 0.398 |
| gross        | totale          | 0.493 |
| injury       | ferita          | 0.532 |
| injury       | lesione         | 0.745 |
| lecture      | conferenza      | 0.65  |
| lecture      | lezione         | 0.717 |
| library      | biblioteca      | 0.832 |
| license      | autorizzare     | 0.399 |
| lurid        | livido          | 0.365 |
| luxury       | lusso           | 0.883 |
| magazine     | giornale        | 0.694 |
| magazine     | rivista         | 0.739 |
| mansion      | residenza       | 0.526 |
| mansion      | villa           | 0.724 |
| mess         | confusione      | 0.549 |
| misery       | sofferenza      | 0.703 |
| morbid       | morboso         | 0.624 |
| novel        | romanzo         | 0.814 |
| occur        | accadere        | 0.718 |
| occur        | capitare        | 0.611 |
| ostrich      | struzzo         | 0.613 |
| parent       | genitore        | 0.774 |
| patent       | brevetto        | 0.764 |
| pavement     | marciapiede     | 0.671 |
| petrol       | benzina         | 0.741 |
| policy       | politica        | 0.684 |
| portfolio    | portadocumenti  | 0.289 |
| preservative | conservante     | 0.638 |
| presumption  | presupposizione | 0.637 |
| presumption  | supposizione    | 0.554 |
| presumption  | ipotesi         | 0.484 |
| pretend      | fingere         | 0.748 |
| pretend      | simulare        | 0.486 |
| process      | elaborare       | 0.441 |
| process      | procedura       | 0.704 |
| puncture     | bucare          | 0.449 |
| puncture     | foratura        | 0.538 |

|             |                 |       |  |
|-------------|-----------------|-------|--|
| rape        | stupro          | 0.763 |  |
| rate        | tasso           | 0.757 |  |
| rate        | velocità        | 0.492 |  |
| record      | disco           | 0.449 |  |
| record      | primato         | 0.514 |  |
| record      | registro        | 0.447 |  |
| regard      | considerare     | 0.619 |  |
| rest        | riposo          | 0.537 |  |
| retain      | conservare      | 0.772 |  |
| rotten      | marcio          | 0.687 |  |
| rude        | maleducato      | 0.759 |  |
| rude        | scortese        | 0.724 |  |
| rumor       | voce            | 0.24  |  |
| rumor       | pettegolezza    | 0.561 |  |
| rumour      | pettegolezza    | 0.559 |  |
| rumour      | voce            | 0.221 |  |
| sane        | equilibrato     | 0.464 |  |
| scholar     | studioso        | 0.79  |  |
| sensible    | ragionevole     | 0.687 |  |
| sensible    | sensato         | 0.614 |  |
| sensitive   | delicato        | 0.701 |  |
| sensitive   | sensibile       | 0.783 |  |
| spill       | rovesciare      | 0.293 |  |
| spill       | versare         | 0.32  |  |
| stamp       | francobollo     | 0.583 |  |
| stamp       | timbro          | 0.51  |  |
| storm       | tempesta        | 0.79  |  |
| suggestive  | allusivo        | 0.614 |  |
| suggestive  | indicativo      | 0.489 |  |
| sympathetic | compassionevole | 0.527 |  |
| sympathetic | comprensivo     | 0.343 |  |
| tap         | colpetto        | 0.405 |  |
| tap         | rubinetto       | 0.55  |  |
| taste       | gusto           | 0.807 |  |
| taste       | sapore          | 0.739 |  |
| terrific    | fantastico      | 0.756 |  |
| terrific    | magnifico       | 0.701 |  |
| test        | esame           | 0.614 |  |
| ultimate    | fondamentale    | 0.536 |  |
| vacancy     | vuoto           | 0.439 |  |
| verse       | strofa          | 0.701 |  |

## True friends with cosine similarity scores

### Vecmap:

|               |                 |        |               |                |       |
|---------------|-----------------|--------|---------------|----------------|-------|
| academy       | accademia       | 0.61   | final         | finale         | 0.724 |
| accident      | incidente       | 0.805  | front         | fronte         | 0.459 |
| accident      | accidente       | 0.347  | future        | futuro         | 0.819 |
| accidental    | accidentale     | 0.577  | general       | generale       | 0.74  |
| acrobat       | acrobata        | -0.105 | generation    | generazione    | 0.748 |
| altar         | altare          | 0.738  | gentle        | gentile        | 0.348 |
| archaeology   | archeologia     | 0.752  | geographic    | geografico     | 0.704 |
| area          | area            | 0.715  | group         | gruppo         | 0.794 |
| arrange       | arrangiare      | 0.347  | guide         | guida          | 0.63  |
| art           | arte            | 0.821  | historical    | storica        | 0.769 |
| artificial    | artificiale     | 0.703  | human         | umano          | 0.659 |
| assassinate   | assassinare     | 0.651  | hypothesis    | ipotesi        | 0.519 |
| attention     | attenzione      | 0.717  | important     | importante     | 0.835 |
| automatic     | automatico      | 0.769  | include       | includere      | 0.642 |
| band          | banda           | 0.465  | industry      | industria      | 0.774 |
| bank          | banca           | 0.745  | information   | informazione   | 0.652 |
| blue          | blu             | 0.772  | ingredient    | ingrediente    | 0.717 |
| canal         | canale          | 0.481  | invited       | invitato       | 0.812 |
| cancel        | cancellare      | 0.435  | january       | gennaio        | 0.846 |
| casino        | casinò          | 0.624  | jewelry       | gioielli       | 0.56  |
| casual        | casuale         | 0.319  | laboratory    | laboratorio    | 0.699 |
| caution       | cautela         | 0.662  | large         | largo          | 0.25  |
| celebration   | celebrazione    | 0.735  | literature    | letteratura    | 0.798 |
| classic       | classico        | 0.625  | local         | locale         | 0.757 |
| collaborate   | collaborare     | 0.705  | lottery       | lotteria       | 0.558 |
| comic         | comico          | 0.577  | luxury        | lusso          | 0.747 |
| communication | comunicazione   | 0.762  | melody        | melodia        | 0.705 |
| concert       | concerto        | 0.657  | minor         | minore         | 0.37  |
| conclude      | concludere      | 0.612  | minute        | minuto         | 0.696 |
| consider      | considerare     | 0.694  | modern        | moderno        | 0.78  |
| contact       | contatto        | 0.611  | national      | nazionale      | 0.762 |
| convenience   | convenienza     | 0.505  | native        | nativo         | 0.512 |
| correct       | corretto        | 0.635  | natural       | naturale       | 0.699 |
| cream         | crema           | 0.632  | nature        | natura         | 0.777 |
| cure          | cura            | 0.2    | notice        | notare         | 0.258 |
| defend        | difendere       | 0.844  | notice        | notizia        | 0.355 |
| definitely    | definitivamente | 0.178  | opinion       | opinione       | 0.712 |
| democracy     | democrazia      | 0.875  | organism      | organismo      | 0.535 |
| dentist       | dentista        | 0.691  | organization  | organizzazione | 0.702 |
| describe      | descrivere      | 0.829  | organize      | organizzare    | 0.764 |
| dialect       | dialetto        | 0.713  | original      | originale      | 0.706 |
| diffident     | diffidente      | 0.454  | paradise      | paradiso       | 0.576 |
| dollar        | dollaro         | 0.669  | perfect       | perfetto       | 0.678 |
| dramatic      | drammatico      | 0.665  | personal      | personale      | 0.587 |
| economy       | economia        | 0.778  | physiological | fisiologico    | 0.492 |
| episode       | episodio        | 0.695  | poet          | poeta          | 0.832 |
| error         | errore          | 0.782  | policy        | politica       | 0.655 |
| europe        | europa          | 0.808  | poor          | povero         | 0.504 |
| evolution     | evoluzione      | 0.758  | popular       | popolare       | 0.582 |
| exalted       | esaltato        | 0.353  | population    | popolazione    | 0.697 |
| exam          | esame           | 0.5    | problem       | problema       | 0.818 |
| exist         | esistere        | 0.727  | process       | processare     | 0.18  |
| fact          | fatto           | 0.615  | proper        | appropriato    | 0.574 |
| family        | famiglia        | 0.82   | public        | pubblico       | 0.698 |
| fantastic     | fantastico      | 0.676  | publicity     | pubblicità     | 0.567 |



|             |               |       |       |
|-------------|---------------|-------|-------|
| puncture    | puntura       | 0.362 |       |
| question    | questione     |       | 0.685 |
| region      | regione       | 0.66  |       |
| relevant    | relevante     |       | 0.473 |
| represent   | rappresentare |       | 0.746 |
| romance     | romanticismo  |       | 0.484 |
| romance     | romanzo       |       | 0.489 |
| sense       | senso         | 0.667 |       |
| situation   | situazione    |       | 0.825 |
| special     | speciale      | 0.705 |       |
| study       | studio        | 0.729 |       |
| symphony    | sinfonia      | 0.572 |       |
| technical   | tecnico       | 0.715 |       |
| telephone   | telefono      |       | 0.776 |
| temperature | temperatura   |       | 0.868 |
| tourist     | turista       | 0.624 |       |
| traditional | tradizionale  |       | 0.838 |
| traffic     | traffico      | 0.74  |       |
| typical     | tipico        | 0.635 |       |
| universe    | universo      |       | 0.745 |
| university  | università    |       | 0.833 |
| utility     | utilità       | 0.465 |       |
| verify      | verificare    |       | 0.718 |
| verse       | verso         | 0.008 |       |
| village     | villaggio     | 0.655 |       |
| vital       | vitale        | 0.609 |       |
| zone        | zona          | 0.601 |       |

## Concepts:

|               |                 |        |               |                |       |
|---------------|-----------------|--------|---------------|----------------|-------|
| academy       | accademia       | 0.676  | final         | finale         | 0.756 |
| accident      | incidente       | 0.793  | front         | fronte         | 0.594 |
| accident      | accidente       | 0.124  | future        | futuro         | 0.683 |
| accidental    | accidentale     | 0.743  | general       | generale       | 0.701 |
| acrobat       | acrobata        | 0.583  | generation    | generazione    | 0.675 |
| altar         | altare          | 0.756  | gentle        | gentile        | 0.481 |
| archaeology   | archeologia     | 0.807  | geographic    | geografico     | 0.574 |
| area          | area            | 0.772  | group         | gruppo         | 0.682 |
| arrange       | arrangiare      | 0.484  | guide         | guida          | 0.194 |
| art           | arte            | 0.748  | historical    | storica        | 0.679 |
| artificial    | artificiale     | 0.657  | human         | umano          | 0.66  |
| assassinate   | assassinare     | 0.788  | hypothesis    | ipotesi        | 0.697 |
| attention     | attenzione      | 0.586  | important     | importante     | 0.758 |
| automatic     | automatico      | 0.638  | include       | includere      | 0.613 |
| band          | banda           | 0.338  | industry      | industria      | 0.762 |
| bank          | banca           | 0.634  | information   | informazione   | 0.715 |
| blue          | blu             | 0.777  | ingredient    | ingrediente    | 0.717 |
| canal         | canale          | 0.498  | invited       | invitato       | 0.801 |
| cancel        | cancellare      | 0.606  | january       | gennaio        | 0.756 |
| casino        | casinò          | 0.729  | jewelry       | gioielli       | 0.753 |
| casual        | casuale         | 0.328  | laboratory    | laboratorio    | 0.738 |
| caution       | cautela         | 0.413  | large         | largo          | 0.285 |
| celebration   | celebrazione    | 0.775  | literature    | letteratura    | 0.826 |
| classic       | classico        | 0.644  | local         | locale         | 0.627 |
| collaborate   | collaborare     | 0.723  | lottery       | lotteria       | 0.533 |
| comic         | comico          | 0.546  | luxury        | lusso          | 0.789 |
| communication | comunicazione   | 0.771  | melody        | melodia        | 0.838 |
| concert       | concerto        | 0.823  | minor         | minore         | 0.328 |
| conclude      | concludere      | 0.607  | minute        | minuto         | 0.583 |
| consider      | considerare     | 0.767  | modern        | moderno        | 0.693 |
| contact       | contatto        | 0.637  | national      | nazionale      | 0.691 |
| convenience   | convenienza     | 0.398  | native        | nativo         | 0.55  |
| correct       | corretto        | 0.704  | natural       | naturale       | 0.695 |
| cream         | crema           | 0.43   | nature        | natura         | 0.8   |
| cure          | cura            | 0.343  | notice        | notare         | 0.195 |
| defend        | difendere       | 0.831  | notice        | notizia        | 0.359 |
| definitely    | definitivamente | -0.053 | opinion       | opinione       | 0.674 |
| democracy     | democrazia      | 0.739  | organism      | organismo      | 0.652 |
| dentist       | dentista        | 0.718  | organization  | organizzazione | 0.745 |
| describe      | descrivere      | 0.803  | organize      | organizzare    | 0.811 |
| dialect       | dialetto        | 0.726  | original      | originale      | 0.756 |
| diffident     | diffidente      | 0.529  | paradise      | paradiso       | 0.6   |
| dollar        | dollaro         | 0.645  | perfect       | perfetto       | 0.726 |
| dramatic      | drammatico      | 0.614  | personal      | personale      | 0.552 |
| economy       | economia        | 0.755  | physiological | fisiologico    | 0.692 |
| episode       | episodio        | 0.769  | poet          | poeta          | 0.807 |
| error         | errore          | 0.739  | policy        | politica       | 0.648 |
| europe        | europa          | 0.724  | poor          | povero         | 0.397 |
| evolution     | evoluzione      | 0.791  | popular       | popolare       | 0.675 |
| exalted       | esaltato        | 0.46   | population    | popolazione    | 0.761 |
| exam          | esame           | 0.547  | problem       | problema       | 0.767 |
| exist         | esistere        | 0.668  | process       | processare     | 0.208 |
| fact          | fatto           | 0.546  | proper        | appropriato    | 0.466 |
| family        | famiglia        | 0.761  | public        | pubblico       | 0.45  |
| fantastic     | fantastico      | 0.581  | publicity     | pubblicità     | 0.592 |

|             |               |        |
|-------------|---------------|--------|
| puncture    | puntura       | 0.437  |
| question    | questione     | 0.655  |
| region      | regione       | 0.761  |
| relevant    | relevante     | 0.508  |
| represent   | rappresentare | 0.789  |
| romance     | romanticismo  | 0.441  |
| romance     | romanzo       | 0.505  |
| sense       | senso         | 0.689  |
| situation   | situazione    | 0.735  |
| special     | speciale      | 0.623  |
| study       | studio        | 0.513  |
| symphony    | sinfonia      | 0.601  |
| technical   | tecnico       | 0.471  |
| telephone   | telefono      | 0.575  |
| temperature | temperatura   | 0.816  |
| tourist     | turista       | 0.354  |
| traditional | tradizionale  | 0.787  |
| traffic     | traffico      | 0.74   |
| typical     | tipico        | 0.722  |
| universe    | universo      | 0.805  |
| university  | università    | 0.784  |
| utility     | utilità       | 0.554  |
| verify      | verificare    | 0.781  |
| verse       | verso         | -0.058 |
| village     | villaggio     | 0.775  |
| vital       | vitale        | 0.496  |
| zone        | zona          | 0.537  |

## FastText:

|               |                 |       |
|---------------|-----------------|-------|
| academy       | accademia       | 0.764 |
| accident      | incidente       | 0.855 |
| accident      | accidente       | 0.52  |
| accidental    | accidentale     | 0.778 |
| acrobat       | acrobata        | 0.665 |
| altar         | altare          | 0.767 |
| archaeology   | archeologia     | 0.86  |
| area          | area            | 0.795 |
| arrange       | arrangiare      | 0.462 |
| art           | arte            | 0.855 |
| artificial    | artificiale     | 0.84  |
| assassinate   | assassinare     | 0.8   |
| attention     | attenzione      | 0.808 |
| automatic     | automatico      | 0.812 |
| band          | banda           | 0.571 |
| bank          | banca           | 0.814 |
| blue          | blu             | 0.861 |
| canal         | canale          | 0.56  |
| cancel        | cancellare      | 0.546 |
| casino        | casinò          | 0.836 |
| casual        | casuale         | 0.458 |
| caution       | cautela         | 0.754 |
| celebration   | celebrazione    | 0.827 |
| classic       | classico        | 0.803 |
| collaborate   | collaborare     | 0.804 |
| comic         | comico          | 0.589 |
| communication | comunicazione   | 0.838 |
| concert       | concerto        | 0.839 |
| conclude      | concludere      | 0.76  |
| consider      | considerare     | 0.847 |
| contact       | contatto        | 0.786 |
| convenience   | convenienza     | 0.632 |
| correct       | corretto        | 0.748 |
| cream         | crema           | 0.729 |
| cure          | cura            | 0.363 |
| defend        | difendere       | 0.887 |
| definitely    | definitivamente | 0.347 |
| democracy     | democrazia      | 0.891 |
| dentist       | dentista        | 0.792 |
| describe      | descrivere      | 0.886 |
| dialect       | dialetto        | 0.765 |
| diffident     | diffidente      | 0.609 |
| dollar        | dollaro         | 0.731 |
| dramatic      | drammatico      | 0.786 |
| economy       | economia        | 0.847 |
| episode       | episodio        | 0.803 |
| error         | errore          | 0.815 |
| europa        | europa          | 0.834 |
| evolution     | evoluzione      | 0.843 |
| exalted       | esaltato        | 0.48  |
| exam          | esame           | 0.668 |
| exist         | esistere        | 0.811 |
| fact          | fatto           | 0.666 |
| family        | famiglia        | 0.879 |
| fantastic     | fantastico      | 0.853 |

|               |                |       |
|---------------|----------------|-------|
| final         | finale         | 0.793 |
| front         | fronte         | 0.651 |
| future        | futuro         | 0.836 |
| general       | generale       | 0.829 |
| generation    | generazione    | 0.845 |
| gentle        | gentile        | 0.516 |
| geographic    | geografico     | 0.835 |
| group         | gruppo         | 0.859 |
| guide         | guida          | 0.741 |
| historical    | storica        | 0.804 |
| human         | umano          | 0.784 |
| hypothesis    | ipotesi        | 0.665 |
| important     | importante     | 0.874 |
| include       | includere      | 0.759 |
| industry      | industria      | 0.804 |
| information   | informazione   | 0.736 |
| ingredient    | ingrediente    | 0.799 |
| invited       | invitato       | 0.862 |
| january       | gennaio        | 0.77  |
| jewelry       | gioielli       | 0.789 |
| laboratory    | laboratorio    | 0.816 |
| large         | largo          | 0.464 |
| literature    | letteratura    | 0.88  |
| local         | locale         | 0.778 |
| lottery       | lotteria       | 0.782 |
| luxury        | lusso          | 0.883 |
| melody        | melodia        | 0.866 |
| minor         | minore         | 0.555 |
| minute        | minuto         | 0.817 |
| modern        | moderno        | 0.886 |
| national      | nazionale      | 0.858 |
| native        | nativo         | 0.735 |
| natural       | naturale       | 0.858 |
| nature        | natura         | 0.869 |
| notice        | notare         | 0.59  |
| notice        | notizia        | 0.475 |
| opinion       | opinione       | 0.786 |
| organism      | organismo      | 0.703 |
| organization  | organizzazione | 0.794 |
| organize      | organizzare    | 0.827 |
| original      | originale      | 0.793 |
| paradise      | paradiso       | 0.78  |
| perfect       | perfetto       | 0.862 |
| personal      | personale      | 0.741 |
| physiological | fisiologico    | 0.689 |
| poet          | poeta          | 0.875 |
| policy        | politica       | 0.684 |
| poor          | povero         | 0.704 |
| popular       | popolare       | 0.782 |
| population    | popolazione    | 0.853 |
| problem       | problema       | 0.908 |
| process       | processare     | 0.468 |
| proper        | appropriato    | 0.667 |
| public        | pubblico       | 0.767 |
| publicity     | pubblicità     | 0.63  |

|             |               |       |       |
|-------------|---------------|-------|-------|
| puncture    | puntura       | 0.515 |       |
| question    | questione     |       | 0.709 |
| region      | regione       | 0.805 |       |
| relevant    | relevante     |       | 0.647 |
| represent   | rappresentare |       | 0.82  |
| romance     | romanticismo  |       | 0.713 |
| romance     | romanzo       |       | 0.603 |
| sense       | senso         | 0.793 |       |
| situation   | situazione    |       | 0.874 |
| special     | speciale      | 0.876 |       |
| study       | studio        | 0.807 |       |
| symphony    | sinfonia      | 0.743 |       |
| technical   | tecnico       | 0.769 |       |
| telephone   | telefono      |       | 0.76  |
| temperature | temperatura   |       | 0.904 |
| tourist     | turista       | 0.748 |       |
| traditional | tradizionale  |       | 0.892 |
| traffic     | traffico      | 0.8   |       |
| typical     | tipico        | 0.765 |       |
| universe    | universo      |       | 0.85  |
| university  | università    |       | 0.868 |
| utility     | utilità       | 0.63  |       |
| verify      | verificare    |       | 0.813 |
| verse       | verso         | 0.133 |       |
| village     | villaggio     | 0.837 |       |
| vital       | vitale        | 0.748 |       |
| zone        | zona          | 0.678 |       |

## Normal translations with cosine similarity scores

### Vecmap:

|             |                |       |             |                |       |  |
|-------------|----------------|-------|-------------|----------------|-------|--|
| accident    | infortunio     | 0.556 | good        | bene           | 0.461 |  |
| address     | indirizzo      | 0.448 | gracious    | clemente       | 0.106 |  |
| advertise   | promuovere     | 0.357 | grant       | concedere      | 0.488 |  |
| advice      | consiglio      | 0.368 | great       | grande         | 0.72  |  |
| appropriate | adeguato       | 0.674 | grow        | crescere       | 0.772 |  |
| argument    | discussione    | 0.432 | ham         | prosciutto     | 0.24  |  |
| ask         | chiedere       | 0.705 | height      | altezza        | 0.63  |  |
| attitude    | comportamento  | 0.555 | hide        | nascondere     | 0.702 |  |
| award       | premio         | 0.717 | hill        | collina        | 0.602 |  |
| aware       | consapevole    | 0.667 | honey       | miele          | 0.584 |  |
| back        | indietro       | 0.553 | huge        | enorme         | 0.829 |  |
| bad         | male           | 0.491 | hurt        | ferire         | 0.476 |  |
| bed         | letto          | 0.415 | ill         | malato         | 0.494 |  |
| book        | libro          | 0.833 | improve     | migliorare     | 0.885 |  |
| break       | rompere        | 0.544 | iron        | ferro          | 0.607 |  |
| camera      | fotocamera     | 0.627 | issue       | problema       | 0.621 |  |
| camera      | videocamera    | 0.672 | jam         | marmellata     | 0.309 |  |
| car         | carrozza       | 0.472 | january     | gennaio        | 0.846 |  |
| carefully   | accuratamente  | 0.697 | jewelry     | gioielli       | 0.56  |  |
| carry       | trasportare    | 0.505 | journey     | viaggio        | 0.812 |  |
| chance      | opportunità    | 0.593 | keep        | tenere         | 0.633 |  |
| claim       | reclamo        | 0.405 | kind        | tipo           | 0.575 |  |
| code        | codice         | 0.726 | know        | conoscere      | 0.579 |  |
| code        | prefisso       | 0.358 | lack        | manca          | 0.818 |  |
| cold        | raffreddore    | 0.384 | large       | grande         | 0.558 |  |
| convenience | comodità       | 0.651 | large       | grosso         | 0.529 |  |
| crash       | schianto       | 0.577 | leave       | partire        | 0.246 |  |
| cream       | panna          | 0.571 | light       | luce           | 0.715 |  |
| cream       | panna          | 0.571 | live        | vivere         | 0.613 |  |
| crowd       | folla          | 0.69  | love        | amare          | 0.653 |  |
| dear        | caro           | 0.635 | lunch       | pranzo         | 0.762 |  |
| definitely  | certamente     | 0.589 | lurid       | livido         | 0.279 |  |
| dirty       | sporco         | 0.557 | marry       | sposare        | 0.733 |  |
| disgrace    | vergogna       | 0.578 | mean        | significare    | 0.544 |  |
| disgrace    | disonore       | 0.597 | mess        | disordine      | 0.408 |  |
| dope        | droga          | 0.534 | misery      | infelicità     | 0.587 |  |
| draw        | disegnare      | 0.409 | mood        | umore          | 0.712 |  |
| drive       | guidare        | 0.511 | mutually    | reciprocamente | 0.598 |  |
| dry         | asciugare      | 0.394 | near        | vicino         | 0.6   |  |
| early       | presto         | 0.272 | next        | prossimo       | 0.639 |  |
| enough      | abbastanza     | 0.603 | nothing     | niente         | 0.71  |  |
| erase       | cancellare     | 0.656 | notice      | avviso         | 0.386 |  |
| even        | pari           | 0.002 | novel       | romanzo        | 0.794 |  |
| everything  | tutto          | 0.706 | old         | vecchio        | 0.662 |  |
| exalted     | elevato        | 0.199 | open        | aprire         | 0.537 |  |
| fair        | giusto         | 0.447 | overview    | panoramica     | 0.629 |  |
| feature     | caratteristica | 0.585 | pattern     | modello        | 0.442 |  |
| fog         | nebbia         | 0.664 | paw         | zampa          | 0.456 |  |
| friend      | amico          | 0.799 | presumption | supposizione   | 0.378 |  |
| front       | facciata       | 0.335 | pretends    | simulare       | 0.181 |  |
| frozen      | congelato      | 0.555 | pretend     | fingere        | 0.599 |  |
| funny       | divertente     | 0.622 | pretty      | bella          | 0.354 |  |
| gather      | raccogliere    | 0.674 | process     | procedura      | 0.576 |  |
| gentle      | dolce          | 0.484 | proper      | giusto         | 0.469 |  |
| gentle      | delicato       | 0.31  | proper      | vero           | 0.278 |  |

|            |              |       |  |
|------------|--------------|-------|--|
| proper     | appropriato  | 0.574 |  |
| provide    | fornire      | 0.839 |  |
| purchase   | acquistare   | 0.777 |  |
| purposes   | scopo        | 0.806 |  |
| question   | domanda      | 0.645 |  |
| queue      | coda         | 0.39  |  |
| quick      | presto       | 0.266 |  |
| quiet      | silenzioso   | 0.587 |  |
| range      | gamma        | 0.744 |  |
| referee    | arbitro      | 0.677 |  |
| relevant   | pertinente   | 0.543 |  |
| retain     | mantenere    | 0.667 |  |
| right      | destra       | 0.398 |  |
| rope       | corda        | 0.618 |  |
| rumor      | pettegolezzo | 0.303 |  |
| rumour     | voce         | 0.117 |  |
| sadly      | purtroppo    | 0.69  |  |
| say        | dire         | 0.727 |  |
| sort       | ordinare     | 0.216 |  |
| storm      | temporale    | 0.236 |  |
| sure       | sicuro       | 0.633 |  |
| target     | bersaglio    | 0.622 |  |
| taste      | gusto        | 0.722 |  |
| tell       | raccontare   | 0.535 |  |
| test       | verifica     | 0.532 |  |
| test       | esame        | 0.426 |  |
| tomorrow   | domani       | 0.801 |  |
| ultimate   | definitivo   | 0.331 |  |
| under      | sotto        | 0.632 |  |
| understand | capire       | 0.806 |  |
| upset      | irritato     | 0.475 |  |
| vacancy    | vuoto        | 0.284 |  |
| verse      | strofa       | 0.564 |  |
| view       | vista        | 0.548 |  |
| void       | vuoto        | 0.437 |  |
| want       | volere       | 0.337 |  |
| welfare    | benessere    | 0.576 |  |
| wolf       | lupo         | 0.43  |  |
| yard       | cortile      | 0.355 |  |
| yesterday  | ieri         | 0.763 |  |
| yolk       | tuorlo       | 0.565 |  |
| zest       | gusto        | 0.334 |  |

## Concepts:

|             |                |       |             |                |       |  |
|-------------|----------------|-------|-------------|----------------|-------|--|
| accident    | infortunio     | 0.405 | good        | bene           | 0.535 |  |
| address     | indirizzo      | 0.464 | gracious    | clemente       | 0.091 |  |
| advertise   | promuovere     | 0.497 | grant       | concedere      | 0.43  |  |
| advice      | consiglio      | 0.242 | great       | grande         | 0.598 |  |
| appropriate | adeguato       | 0.655 | grow        | crescere       | 0.761 |  |
| argument    | discussione    | 0.591 | ham         | prosciutto     | 0.256 |  |
| ask         | chiedere       | 0.723 | height      | altezza        | 0.717 |  |
| attitude    | comportamento  | 0.573 | hide        | nascondere     | 0.767 |  |
| award       | premio         | 0.683 | hill        | collina        | 0.644 |  |
| aware       | consapevole    | 0.732 | honey       | miele          | 0.644 |  |
| back        | indietro       | 0.584 | huge        | enorme         | 0.742 |  |
| bad         | male           | 0.467 | hurt        | ferire         | 0.548 |  |
| bed         | letto          | 0.655 | ill         | malato         | 0.547 |  |
| book        | libro          | 0.82  | improve     | migliorare     | 0.856 |  |
| break       | rompere        | 0.564 | iron        | ferro          | 0.638 |  |
| camera      | fotocamera     | 0.662 | issue       | problema       | 0.391 |  |
| camera      | videocamera    | 0.677 | jam         | marmellata     | 0.237 |  |
| car         | carrozza       | 0.607 | january     | gennaio        | 0.756 |  |
| carefully   | accuratamente  | 0.728 | jewelry     | gioielli       | 0.753 |  |
| carry       | trasportare    | 0.71  | journey     | viaggio        | 0.79  |  |
| chance      | opportunità    | 0.53  | keep        | tenere         | 0.667 |  |
| claim       | reclamo        | 0.426 | kind        | tipo           | 0.4   |  |
| code        | codice         | 0.722 | know        | conoscere      | 0.574 |  |
| code        | prefisso       | 0.415 | lack        | manca          | 0.8   |  |
| cold        | raffreddore    | 0.287 | large       | grande         | 0.5   |  |
| convenience | comodità       | 0.562 | large       | grosso         | 0.451 |  |
| crash       | schianto       | 0.649 | leave       | partire        | 0.044 |  |
| cream       | pomata         | 0.28  | light       | luce           | 0.571 |  |
| cream       | panna          | 0.56  | live        | vivere         | 0.415 |  |
| crowd       | folla          | 0.658 | love        | amare          | 0.573 |  |
| dear        | caro           | 0.54  | lunch       | pranzo         | 0.591 |  |
| definitely  | certamente     | 0.43  | lurid       | livido         | 0.245 |  |
| dirty       | sporco         | 0.582 | marry       | sposare        | 0.815 |  |
| disgrace    | vergogna       | 0.607 | mean        | significare    | 0.579 |  |
| disgrace    | disonore       | 0.641 | mess        | disordine      | 0.205 |  |
| dope        | droga          | 0.39  | misery      | infelicità     | 0.621 |  |
| draw        | disegnare      | 0.237 | mood        | umore          | 0.623 |  |
| drive       | guidare        | 0.301 | mutually    | reciprocamente | 0.532 |  |
| dry         | asciugare      | 0.493 | near        | vicino         | 0.681 |  |
| early       | presto         | 0.188 | next        | prossimo       | 0.327 |  |
| enough      | abbastanza     | 0.631 | nothing     | niente         | 0.652 |  |
| erase       | cancellare     | 0.737 | notice      | avviso         | 0.544 |  |
| even        | pari           | 0.074 | novel       | romanzo        | 0.825 |  |
| everything  | tutto          | 0.505 | old         | vecchio        | 0.458 |  |
| exalted     | elevato        | 0.265 | open        | aprire         | 0.382 |  |
| fair        | giusto         | 0.205 | overview    | panoramica     | 0.329 |  |
| feature     | caratteristica | 0.394 | pattern     | modello        | 0.374 |  |
| fog         | nebbia         | 0.764 | paw         | zampa          | 0.409 |  |
| friend      | amico          | 0.765 | presumption | supposizione   | 0.429 |  |
| front       | facciata       | 0.36  | pretends    | simulare       | 0.27  |  |
| frozen      | congelato      | 0.67  | pretend     | fingere        | 0.699 |  |
| funny       | divertente     | 0.765 | pretty      | bella          | 0.52  |  |
| gather      | raccogliere    | 0.727 | process     | procedura      | 0.535 |  |
| gentle      | dolce          | 0.574 | proper      | giusto         | 0.377 |  |
| gentle      | delicato       | 0.444 | proper      | vero           | 0.123 |  |



|            |              |       |  |
|------------|--------------|-------|--|
| proper     | appropriato  | 0.466 |  |
| provide    | fornire      | 0.85  |  |
| purchase   | acquistare   | 0.765 |  |
| purposes   | scopo        | 0.603 |  |
| question   | domanda      | 0.493 |  |
| queue      | coda         | 0.143 |  |
| quick      | presto       | 0.146 |  |
| quiet      | silenzioso   | 0.619 |  |
| range      | gamma        | 0.515 |  |
| referee    | arbitro      | 0.769 |  |
| relevant   | pertinente   | 0.473 |  |
| retain     | mantenere    | 0.697 |  |
| right      | destra       | 0.477 |  |
| rope       | corda        | 0.73  |  |
| rumor      | pettegolezzo | 0.455 |  |
| rumour     | voce         | 0.156 |  |
| sadly      | purtroppo    | 0.688 |  |
| say        | dire         | 0.676 |  |
| sort       | ordinare     | 0.171 |  |
| storm      | temporale    | 0.19  |  |
| sure       | sicuro       | 0.55  |  |
| target     | bersaglio    | 0.719 |  |
| taste      | gusto        | 0.674 |  |
| tell       | raccontare   | 0.699 |  |
| test       | verifica     | 0.408 |  |
| test       | esame        | 0.439 |  |
| tomorrow   | domani       | 0.707 |  |
| ultimate   | definitivo   | 0.208 |  |
| under      | sotto        | 0.504 |  |
| understand | capire       | 0.713 |  |
| upset      | irritato     | 0.486 |  |
| vacancy    | vuoto        | 0.156 |  |
| verse      | strofa       | 0.657 |  |
| view       | vista        | 0.462 |  |
| void       | vuoto        | 0.486 |  |
| want       | volere       | 0.318 |  |
| welfare    | benessere    | 0.574 |  |
| wolf       | lupo         | 0.608 |  |
| yard       | cortile      | 0.261 |  |
| yesterday  | ieri         | 0.615 |  |
| yolk       | tuorlo       | 0.555 |  |
| zest       | gusto        | 0.38  |  |

## FastText:

|             |                |       |
|-------------|----------------|-------|
| accident    | infortunio     | 0.561 |
| address     | indirizzo      | 0.563 |
| advertise   | promuovere     | 0.603 |
| advice      | consiglio      | 0.609 |
| appropriate | adeguato       | 0.756 |
| argument    | discussione    | 0.57  |
| ask         | chiedere       | 0.849 |
| attitude    | comportamento  | 0.61  |
| award       | premio         | 0.798 |
| aware       | consapevole    | 0.749 |
| back        | indietro       | 0.676 |
| bad         | male           | 0.708 |
| bed         | letto          | 0.609 |
| book        | libro          | 0.858 |
| break       | rompere        | 0.649 |
| camera      | fotocamera     | 0.758 |
| camera      | videocamera    | 0.809 |
| car         | carrozza       | 0.513 |
| carefully   | accuratamente  | 0.79  |
| carry       | trasportare    | 0.717 |
| chance      | opportunità    | 0.605 |
| claim       | reclamo        | 0.506 |
| code        | codice         | 0.79  |
| code        | prefisso       | 0.337 |
| cold        | raffreddore    | 0.511 |
| convenience | comodità       | 0.713 |
| crash       | schianto       | 0.696 |
| cream       | pomata         | 0.486 |
| cream       | panna          | 0.675 |
| crowd       | folla          | 0.77  |
| dear        | caro           | 0.691 |
| definitely  | certamente     | 0.74  |
| dirty       | sporco         | 0.734 |
| disgrace    | vergogna       | 0.697 |
| disgrace    | disonore       | 0.683 |
| dope        | droga          | 0.605 |
| draw        | disegnare      | 0.57  |
| drive       | guidare        | 0.605 |
| dry         | asciugare      | 0.517 |
| early       | presto         | 0.504 |
| enough      | abbastanza     | 0.612 |
| erase       | cancellare     | 0.708 |
| even        | pari           | 0.322 |
| everything  | tutto          | 0.783 |
| exalted     | elevato        | 0.44  |
| fair        | giusto         | 0.551 |
| feature     | caratteristica | 0.666 |
| fog         | nebbia         | 0.799 |
| friend      | amico          | 0.858 |
| front       | facciata       | 0.504 |
| frozen      | congelato      | 0.753 |
| funny       | divertente     | 0.705 |
| gather      | raccogliere    | 0.762 |
| gentle      | dolce          | 0.563 |
| gentle      | delicato       | 0.595 |

|             |                |       |
|-------------|----------------|-------|
| good        | bene           | 0.655 |
| gracious    | clemente       | 0.514 |
| grant       | concedere      | 0.639 |
| great       | grande         | 0.752 |
| grow        | crescere       | 0.861 |
| ham         | prosciutto     | 0.516 |
| height      | altezza        | 0.736 |
| hide        | nascondere     | 0.817 |
| hill        | collina        | 0.78  |
| honey       | miele          | 0.67  |
| huge        | enorme         | 0.856 |
| hurt        | ferire         | 0.669 |
| ill         | malato         | 0.684 |
| improve     | migliorare     | 0.926 |
| iron        | ferro          | 0.789 |
| issue       | problema       | 0.769 |
| jam         | marmellata     | 0.437 |
| january     | gennaio        | 0.77  |
| jewelry     | gioielli       | 0.789 |
| journey     | viaggio        | 0.767 |
| keep        | tenere         | 0.758 |
| kind        | tipo           | 0.742 |
| know        | conoscere      | 0.672 |
| lack        | manca          | 0.842 |
| large       | grande         | 0.668 |
| large       | grosso         | 0.688 |
| leave       | partire        | 0.431 |
| light       | luce           | 0.781 |
| live        | vivere         | 0.727 |
| love        | amare          | 0.702 |
| lunch       | pranzo         | 0.793 |
| lurid       | livido         | 0.365 |
| marry       | sposare        | 0.815 |
| mean        | significare    | 0.734 |
| mess        | disordine      | 0.621 |
| misery      | infelicità     | 0.718 |
| mood        | umore          | 0.774 |
| mutually    | reciprocamente | 0.694 |
| near        | vicino         | 0.73  |
| next        | prossimo       | 0.79  |
| nothing     | niente         | 0.841 |
| notice      | avviso         | 0.579 |
| novel       | romanzo        | 0.814 |
| old         | vecchio        | 0.792 |
| open        | aprire         | 0.632 |
| overview    | panoramica     | 0.662 |
| pattern     | modello        | 0.515 |
| paw         | zampa          | 0.661 |
| presumption | supposizione   | 0.554 |
| pretends    | simulare       | 0.486 |
| pretend     | fingere        | 0.748 |
| pretty      | bella          | 0.6   |
| process     | procedura      | 0.704 |
| proper      | giusto         | 0.637 |
| proper      | vero           | 0.456 |

|            |              |       |
|------------|--------------|-------|
| proper     | appropriato  | 0.667 |
| provide    | fornire      | 0.894 |
| purchase   | acquistare   | 0.793 |
| purpos     | scopo        | 0.812 |
| question   | domanda      | 0.787 |
| queue      | coda         | 0.462 |
| quick      | presto       | 0.398 |
| quiet      | silenzioso   | 0.775 |
| range      | gamma        | 0.764 |
| referee    | arbitro      | 0.757 |
| relevant   | pertinente   | 0.694 |
| retain     | mantenere    | 0.738 |
| right      | destra       | 0.559 |
| rope       | corda        | 0.718 |
| rumor      | pettegolezzo | 0.561 |
| rumour     | voce         | 0.221 |
| sadly      | purtroppo    | 0.845 |
| say        | dire         | 0.849 |
| sort       | ordinare     | 0.365 |
| storm      | temporale    | 0.465 |
| sure       | sicuro       | 0.729 |
| target     | bersaglio    | 0.689 |
| taste      | gusto        | 0.807 |
| tell       | raccontare   | 0.69  |
| test       | verifica     | 0.611 |
| test       | esame        | 0.614 |
| tomorrow   | domani       | 0.889 |
| ultimate   | definitivo   | 0.509 |
| under      | sotto        | 0.759 |
| understand | capire       | 0.865 |
| upset      | irritato     | 0.679 |
| vacancy    | vuoto        | 0.439 |
| verse      | strofa       | 0.701 |
| view       | vista        | 0.675 |
| void       | vuoto        | 0.681 |
| want       | volere       | 0.589 |
| welfare    | benessere    | 0.627 |
| wolf       | lupo         | 0.632 |
| yard       | cortile      | 0.594 |
| yesterday  | ieri         | 0.88  |
| yolk       | tuorlo       | 0.662 |
| zest       | gusto        | 0.478 |

### Uncorrelated words with cosine similarity scores

### Vecmap:

|               |              |        |       |              |              |        |        |
|---------------|--------------|--------|-------|--------------|--------------|--------|--------|
| accident      | canzone      |        | 0.008 | misery       | rosso        | 0.022  |        |
| actual        | bello        | 0.021  |       | morbid       | lotteria     | -0.002 |        |
| actually      | maggiormente | 0.343  |       | novel        | palazzo      | 0.057  |        |
| addiction     | posate       | -0.032 |       | occur        | bere         | 0.099  |        |
| advertise     | correre      | 0.161  |       | ostrich      | calcio       | 0.071  |        |
| advice        | fazzoletto   | 0.001  |       | parent       | aereo        | 0.109  |        |
| affluent      | rotondo      | 0.124  |       | patent       | paura        | -0.083 |        |
| argument      | pane         | 0.042  |       | pavement     | consiglio    |        | 0.04   |
| arrange       | tagliare     | 0.186  |       | petrol       | telefono     |        | 0.067  |
| attend        | guardare     |        | 0.218 | policy       | urlo         | -0.065 |        |
| attic         | luna         | 0.06   |       | portfolio    | carne        | -0.034 |        |
| attitude      | canale       | 0.034  |       | preservative | campo        | 0.02   |        |
| bald          | bottiglia    | 0.065  |       | presumption  | lacrima      | 0.041  |        |
| barracks      | tazza        | 0.021  |       | pretend      | sollevare    |        | 0.192  |
| barrister     | cavallo      | -0.027 |       | process      | schiacciare  |        | 0.012  |
| bell          | numero       | 0.148  |       | puncture     | bagno        |        | 0.156  |
| brave         | forchetta    | -0.062 |       | rape         | libro        | 0.03   |        |
| camera        | traduzione   | -0.01  |       | rate         | topo         | -0.011 |        |
| canteen       | schermo      | 0.14   |       | record       | opinione     |        | 0.026  |
| car           | acqua        | 0.127  |       | regard       | amare        | 0.058  |        |
| casino        | collana      | 0.059  |       | rest         | cake         | 0.037  |        |
| casual        | caldo        | 0.111  |       | retain       | pensare      | 0.179  |        |
| caution       | muro         | -0.048 |       | rotten       | definizione  |        | -0.013 |
| code          | pistola      | 0.08   |       | rude         | viaggio      | 0.037  |        |
| cold          | pittura      | 0.091  |       | rumor        | bambino      |        | 0.049  |
| college       | luce         | -0.028 |       | rumour       | bambino      |        | -0.136 |
| comprehensive | tagliente    |        | 0.052 | sane         | storia       | 0.033  |        |
| con           | paragonare   | 0.101  |       | scholar      | vita         | -0.009 |        |
| concurrence   | arte         | -0.012 |       | sensible     | dottore      | 0.03   |        |
| confetti      | vitamine     | -0.008 |       | sensitive    | popolazione  |        | 0.126  |
| confidence    | treno        | -0.015 |       | spill        | scienza      | 0.075  |        |
| confront      | guidare      | 0.336  |       | stamp        | popolo       | 0.159  |        |
| consistent    | raffreddare  |        | 0.083 | storm        | argomento    | 0      |        |
| corpse        | finestra     | 0.114  |       | suggestive   | ideologia    |        | 0.083  |
| crude         | politico     | 0.158  |       | sympathetic  | manipolatore |        | 0.105  |
| dare          | zaino        | 0.021  |       | tap          | eccezione    |        | 0.032  |
| delusion      | forno        | 0.029  |       | taste        | uccisione    |        | -0.036 |
| disgrace      | adesivo      | -0.054 |       | terrific     | sbagliato    |        | 0.097  |
| educated      | tovaglia     | -0.016 |       | test         | letto        | 0.029  |        |
| estate        | bibita       | 0.129  |       | ultimate     | provare      | 0.236  |        |
| factory       | crimine      | 0.105  |       | vacancy      | viola        | 0.065  |        |
| fastidious    | alto         | 0.131  |       | verse        | punto        | 0.164  |        |
| firm          | cultura      | 0.059  |       |              |              |        |        |
| furniture     | pasta        | 0.189  |       |              |              |        |        |
| gracious      | magico       | 0.11   |       |              |              |        |        |
| gross         | piccolo      | 0.137  |       |              |              |        |        |
| injury        | inizio       | 0.056  |       |              |              |        |        |
| lecture       | difesa       | 0.094  |       |              |              |        |        |
| library       | atterraggio  | -0.109 |       |              |              |        |        |
| license       | imitare      | 0.05   |       |              |              |        |        |
| lurid         | cantiere     | -0.007 |       |              |              |        |        |
| luxury        | natura       | 0.043  |       |              |              |        |        |
| magazine      | conquista    |        | 0.057 |              |              |        |        |
| mansion       | curiosità    |        | 0.099 |              |              |        |        |
| mess          | opportunità  | -0.036 |       |              |              |        |        |

## Concepts:

|               |              |        |  |
|---------------|--------------|--------|--|
| accident      | canzone      | 0.036  |  |
| actual        | bello        | 0.038  |  |
| actually      | maggiormente | 0.121  |  |
| addiction     | posate       | -0.03  |  |
| advertise     | correre      | 0.301  |  |
| advice        | fazzoletto   | -0.012 |  |
| affluent      | rotondo      | 0.071  |  |
| argument      | pane         | 0.093  |  |
| arrange       | tagliare     | 0.387  |  |
| attend        | guardare     | 0.335  |  |
| attic         | luna         | 0.182  |  |
| attitude      | canale       | -0.171 |  |
| bald          | bottiglia    | 0.03   |  |
| barracks      | tazza        | -0.001 |  |
| barrister     | cavallo      | -0.103 |  |
| bell          | numero       | -0.033 |  |
| brave         | forchetta    | -0.074 |  |
| camera        | traduzione   | -0.064 |  |
| canteen       | schermo      | 0.045  |  |
| car           | acqua        | 0.11   |  |
| casino        | collana      | 0.145  |  |
| casual        | caldo        | 0.209  |  |
| caution       | muro         | 0.051  |  |
| code          | pistola      | -0.044 |  |
| cold          | pittura      | -0.042 |  |
| college       | luce         | -0.132 |  |
| comprehensive | tagliente    | 0.01   |  |
| con           | paragonare   | 0.036  |  |
| concurrence   | arte         | -0.086 |  |
| confetti      | vitamine     | -0.024 |  |
| confidence    | treno        | -0.083 |  |
| confront      | guidare      | 0.515  |  |
| consistent    | raffreddare  | 0.096  |  |
| corpse        | finestra     | 0.334  |  |
| crude         | politico     | -0.084 |  |
| dare          | zaino        | 0.031  |  |
| delusion      | forno        | -0.055 |  |
| disgrace      | adesivo      | -0.086 |  |
| educated      | tovaglia     | -0.074 |  |
| estate        | bibita       | 0.028  |  |
| factory       | crimine      | -0.071 |  |
| fastidious    | alto         | 0.088  |  |
| firm          | cultura      | 0.047  |  |
| furniture     | pasta        | 0.315  |  |
| gracious      | magico       | 0.155  |  |
| gross         | piccolo      | -0.025 |  |
| injury        | inizio       | 0.115  |  |
| lecture       | difesa       | -0.035 |  |
| library       | atterraggio  | -0.105 |  |
| license       | imitare      | -0.074 |  |
| lurid         | cantiere     | -0.115 |  |
| luxury        | natura       | 0.048  |  |
| magazine      | conquista    | -0.204 |  |
| mansion       | curiosità    | -0.049 |  |
| mess          | opportunità  | -0.055 |  |
| misery        | rosso        | -0.079 |  |
| morbid        | lotteria     | -0.098 |  |
| novel         | palazzo      | -0.062 |  |
| occur         | bere         | 0.148  |  |
| ostrich       | calcio       | -0.044 |  |
| parent        | aereo        | 0.034  |  |
| patent        | paura        | -0.134 |  |
| pavement      | consiglio    | -0.195 |  |
| petrol        | telefono     | 0.157  |  |
| policy        | urlo         | -0.179 |  |
| portfolio     | carne        | 0.005  |  |
| preservative  | campo        | 0.084  |  |
| presumption   | lacrima      | -0.02  |  |
| pretends      | sollevare    | 0.258  |  |
| process       | schiacciare  | 0.033  |  |
| puncture      | bagno        | 0.206  |  |
| rape          | libro        | 0.102  |  |
| rate          | topo         | -0.008 |  |
| record        | opinione     | 0.004  |  |
| regard        | amare        | 0.28   |  |
| rest          | cake         | -0.066 |  |
| retain        | pensare      | 0.273  |  |
| rotten        | definizione  | -0.072 |  |
| rude          | viaggio      | 0.054  |  |
| rumor         | bambino      | 0.195  |  |
| rumour        | bambino      | 0.151  |  |
| sane          | storia       | 0.1    |  |
| scholar       | vita         | 0.025  |  |
| sensible      | dottore      | 0.081  |  |
| sensitive     | popolazione  | 0.064  |  |
| spill         | scienza      | -0.078 |  |
| stamp         | popolo       | 0.073  |  |
| storm         | argomento    | -0.175 |  |
| suggestive    | ideologia    | 0.176  |  |
| sympathetic   | manipolatore | 0.202  |  |
| tap           | eccezione    | 0.049  |  |
| taste         | uccisione    | -0.045 |  |
| terrific      | sbagliato    | 0.316  |  |
| test          | letto        | -0.096 |  |
| ultimate      | provare      | 0.219  |  |
| vacancy       | viola        | -0.116 |  |
| verse         | punto        | 0.116  |  |

### FastText:

|               |              |        |              |              |       |       |
|---------------|--------------|--------|--------------|--------------|-------|-------|
| accident      | canzone      | 0.174  | misery       | rosso        | 0.176 |       |
| actual        | bello        | 0.271  | morbid       | lotteria     | 0.191 |       |
| actually      | maggiormente | 0.555  | novel        | palazzo      | 0.165 |       |
| addiction     | posate       | 0.117  | occur        | bere         | 0.218 |       |
| advertise     | correre      | 0.346  | ostrich      | calcio       | 0.206 |       |
| advice        | fazzoletto   | 0.084  | parent       | aereo        | 0.213 |       |
| affluent      | rotondo      | 0.211  | patent       | paura        | 0.093 |       |
| argument      | pane         | 0.133  | pavement     | consiglio    |       | 0.102 |
| arrange       | tagliare     | 0.458  | petrol       | telefono     | 0.224 |       |
| attend        | guardare     | 0.347  | policy       | urlo         | 0.046 |       |
| attic         | luna         | 0.166  | portfolio    | carne        | 0.14  |       |
| attitude      | canale       | 0.149  | preservative | campo        | 0.14  |       |
| bald          | bottiglia    | 0.105  | presumption  | lacrima      | 0.112 |       |
| barracks      | tazza        | 0.102  | pretend      | sollevare    | 0.426 |       |
| barrister     | cavallo      | 0.032  | process      | schiacciare  | 0.227 |       |
| bell          | numero       | 0.277  | puncture     | bagno        | 0.248 |       |
| brave         | forchetta    | 0.103  | rape         | libro        | 0.184 |       |
| camera        | traduzione   | 0.186  | rate         | topo         | 0.099 |       |
| canteens      | schermo      | 0.189  | record       | opinione     | 0.263 |       |
| car           | acqua        | 0.259  | regard       | amare        | 0.36  |       |
| casino        | collana      | 0.112  | rest         | cake         | 0.256 |       |
| casual        | caldo        | 0.347  | retain       | pensare      | 0.413 |       |
| caution       | muro         | 0.123  | rotten       | definizione  | 0.081 |       |
| code          | pistola      | 0.178  | rude         | viaggio      | 0.159 |       |
| cold          | pittura      | 0.188  | rumor        | bambino      | 0.142 |       |
| college       | luce         | 0.102  | rumour       | bambino      | 0.12  |       |
| comprehensive | tagliente    | 0.217  | sane         | storia       | 0.173 |       |
| con           | paragonare   | 0.169  | scholar      | vita         | 0.157 |       |
| concurrence   | arte         | 0.093  | sensible     | dottore      | 0.21  |       |
| confetti      | vitamine     | 0.116  | sensitive    | popolazione  | 0.179 |       |
| confidence    | treno        | 0.11   | spill        | scienza      | 0.156 |       |
| confront      | guidare      | 0.474  | stamp        | popolo       | 0.193 |       |
| consistent    | raffreddare  | 0.137  | storm        | argomento    | 0.153 |       |
| corpse        | finestra     | 0.215  | suggestive   | ideologia    | 0.228 |       |
| crude         | politico     | 0.23   | sympathetic  | manipolatore | 0.318 |       |
| dare          | zaino        | 0.175  | tap          | eccezione    | 0.182 |       |
| delusion      | forno        | 0.106  | taste        | uccisione    | 0.144 |       |
| disgrace      | adesivo      | 0.133  | terrific     | sbagliato    | 0.272 |       |
| educated      | tovaglia     | -0.006 | test         | letto        | 0.208 |       |
| estate        | bibita       | 0.159  | ultimate     | provare      | 0.346 |       |
| factory       | crimine      | 0.168  | vacancy      | viola        | 0.06  |       |
| fastidious    | alto         | 0.158  | verse        | punto        | 0.256 |       |
| firm          | cultura      | 0.247  |              |              |       |       |
| furniture     | pasta        | 0.238  |              |              |       |       |
| gracious      | magico       | 0.242  |              |              |       |       |
| gross         | piccolo      | 0.24   |              |              |       |       |
| injury        | inizio       | 0.193  |              |              |       |       |
| lecture       | difesa       | 0.219  |              |              |       |       |
| library       | atterraggio  | 0.06   |              |              |       |       |
| license       | imitare      | 0.126  |              |              |       |       |
| lurid         | cantiere     | 0.08   |              |              |       |       |
| luxury        | natura       | 0.31   |              |              |       |       |
| magazine      | conquista    | 0.189  |              |              |       |       |
| mansion       | curiosità    | 0.104  |              |              |       |       |
| mess          | opportunità  | 0.241  |              |              |       |       |
